# Supplementary material for: Optimized Multiresidue Analysis of Organic Contaminants of Priority Concern in a Daily Consumed Fish (Grass Carp)
Source: Hindawi journal article supplement (doi:10.1155/2017/9294024), 2017-01-01
Supplement: f1 [file 9294024.f1.pdf]

**Supplemental materials for**  
**Optimized multi-residue analysis of organic contaminants of priority concern in a daily**  
**consumed fish (grass carp)**

Wei He<sup>a</sup>, Yanru Chen<sup>a</sup>, Chen Yang<sup>a</sup>, Wenxiu Liu<sup>a</sup>, Xiangzhen Kong<sup>a</sup>, Ning Qin<sup>b</sup>, Qishuang He<sup>c</sup>,  
Fuliu Xu<sup>a,\*</sup>

<sup>a</sup>MOE Laboratory for Earth Surface Process, College of Urban & Environmental Sciences, Peking University, Beijing 100871, China

<sup>b</sup>State Key Laboratory of Environmental Criteria and Risk Assessment, Chinese Research Academy of Environmental Sciences, Beijing 100012, China

<sup>c</sup> Beijing Municipal Key Laboratory of Agriculture Environment Monitoring, Beijing, 100097, China.

\*Correspondence author: Tel./Fax: +86 – 10 – 62751177, Email: xufl@urban.pku.edu.cn

The supplemental materials with 30 pages include the instrument conditions of GC/MS matrix in Text S1, fragment ions for identification/quantification plus instrument limit of detection (LOD) for target chemicals in Table S1-S4, ANOVA and IST analysis of extracted target chemicals in blank and spiked fish by EA/CH (1:1), DCM/HEX (4:1), and HEX/ACE(1:1) in Table S5-S7, recoveries (RV), relative standard deviation (RSD), quality judgment (QJ) of target chemicals in spiked fish meat extracted by EA/CH (1:1), DCM/HEX (4:1), and HEX/ACE(1:1) in Table S8, GC/MS abundance of target chemicals at every fraction of GPC from the 10<sup>th</sup> min in Table S9, ANOVA and IST analysis of recoveries of target chemicals in spiked fish meat cleaned up by SPE cartridge (SC) and chromatography column (CC) in Table S10, recoveries of target chemicals at each SPE eluate

when using DCM, DCM/HEX (1:1), HEX in Fig. S1-S4, and recoveries with their standard deviation and their relative standard deviation of target chemicals in spiked fish meat cleaned up by SPE cartridge and chromatography column.

#### Text 1 The instrument conditions of GC/MS matrix

##### 1. Analysis of PAHs

Instrument Agilent 6890GC-5973 inert MSD with electron impact (EI) source

Carrier gas helium purity  $\geq 99.999\%$ , constant flow  $1 \text{ mL min}^{-1}$

Injection splitless injection at  $280^\circ\text{C}$ ,  $1 \mu\text{L}$

Column DB-5 MS 30 m, 0.250 mm inner diameter,  $0.25 \mu\text{m}$  film thickness

Oven program 2 min at  $100^\circ\text{C}$ , then  $5^\circ\text{C min}^{-1}$  to  $305^\circ\text{C}$ , then 10 min at  $305^\circ\text{C}$

MS conditions transfer line  $300^\circ\text{C}$ , quadrupole  $150^\circ\text{C}$ , ion source  $246^\circ\text{C}$

##### 2. Analysis of OCPs

Instrument Agilent 7890GC-5975C MSD with negative chemical ionization (NCI) source

Carrier gas helium purity  $\geq 99.999\%$ , constant flow  $1 \text{ mL min}^{-1}$

Injection splitless injection at  $220^\circ\text{C}$ ,  $1 \mu\text{L}$

Column DB-5MS 30 m, 0.250 mm inner diameter,  $0.25 \mu\text{m}$  film thickness

Oven program 2 min at  $50^\circ\text{C}$ , then  $10^\circ\text{C min}^{-1}$  to  $150^\circ\text{C}$ , then  $3^\circ\text{C min}^{-1}$  to  $240^\circ\text{C}$ , then 5 min at  $240^\circ\text{C}$ , then  $10^\circ\text{C min}^{-1}$  to  $300^\circ\text{C}$ , then 5 min at  $300^\circ\text{C}$

MS conditions transfer line  $250^\circ\text{C}$ , quadrupole  $150^\circ\text{C}$ , ion source  $200^\circ\text{C}$

##### 3. Analysis of PBDEs

Instrument Agilent 7890GC-5975C MSD with NCI source

Carrier gas helium purity  $\geq 99.999\%$ , constant flow  $2 \text{ mL min}^{-1}$

Injection splitless injection at 265°C, 1 µL

Column DB-5MS 15 m, 0.250 mm inner diameter, 0.10 µm film thickness

Oven program 5 min at 110°C, then 20°C min<sup>-1</sup> to 200°C, then 5 min at 200°C, then 10°C min<sup>-1</sup> to 280°C, then 10 min at 280°C, then 20°C min<sup>-1</sup> to 305°C, then 10 min at 305°C

MS conditions transfer line 250°C, quadrupole 150°C, ion source 230°C

#### 4. Analysis of PCBs

Instrument Varian CP3800-320MS GC-MSD/MSD with EI source

Carrier gas helium purity ≥ 99.999%, constant flow 1 mL min<sup>-1</sup>

Injection splitless injection at 220°C, 1 µL

Column DB-5MS 30 m, 0.250 mm inner diameter, 0.25 µm film thickness

Oven program 2 min at 100°C, then 5°C min<sup>-1</sup> to 200°C, then 3°C min<sup>-1</sup> to 270°C, then 5 min at 270°C, then 10°C min<sup>-1</sup> to 300°C, then 5 min at 300°C

MS conditions ion source 230°C

#### 5. Full scan of spiked samples

Instrument Agilent 6890GC-5973 inert MSD with electron impact (EI) source

Carrier gas helium purity ≥ 99.999%, constant flow 1 mL min<sup>-1</sup>

Injection splitless injection at 220°C, 1 µL

Column DB-5 MS 30 m, 0.250 mm inner diameter, 0.25 µm film thickness

Oven program 2 min at 100°C, then 10°C min<sup>-1</sup> to 150°C, then 20°C min<sup>-1</sup> to 300°C, then 10 min at 300°C

MS conditions transfer line 280°C, quadrupole 150°C, ion source 246°C

Scanning mass range 50 – 600

Table S1 Fragment ions for identification/quantification plus instrument limit of detection (LOD)

and method limit of quantification (LOQ) of PAHs

| Analyte (abbreviation)                 | Item No.   | Retention time | $m/z$          |                | LOD<br>ng mL <sup>-1</sup> | LOQ<br>ng g <sup>-1</sup> |
|----------------------------------------|------------|----------------|----------------|----------------|----------------------------|---------------------------|
|                                        |            |                | Identification | Quantification |                            |                           |
| Naphthalene-d <sub>8</sub> (PAH-IS1)   | Z-014J-4   | 8.763          | 136.0          | 136.0          |                            |                           |
| Naphthalene (Nap)                      | Z-014G     | 8.763          | 128.0          | 128.0          | 0.5                        | 0.08                      |
| 2-Fluorobiphenyl (PAH-SS1)             | M-625-09   | 13.153         | 172.0          | 172.0          | 0.5                        | 0.08                      |
| Acenaphthylene (Acy)                   | Z-014G     | 15.269         | 152.0          | 152.0          | 0.5                        | 0.08                      |
| Acenaphthene-d <sub>10</sub> (PAH-IS2) | M-625-02   | 15.934         | 164.0          | 164.0          |                            |                           |
| Acenaphthene (Ace)                     | Z-014G     | 16.070         | 153.0, 154.0   | 153.0          | 1.0                        | 0.17                      |
| Fluorene (Fle)                         | Z-014G     | 18.448         | 166.0          | 166.0          | 0.5                        | 0.08                      |
| Anthracene-d <sub>10</sub> (PAH-IS3)   | Z-014J-2   | 22.988         | 188.0          | 188.0          |                            |                           |
| Phenanthrene (Phe)                     | Z-014G     | 22.833         | 178.0          | 178.0          | 0.5                        | 0.08                      |
| Anthracene (Ant)                       | Z-014G     | 23.072         | 178.0          | 178.0          | 0.5                        | 0.08                      |
| Fluoranthene (Flu)                     | Z-014G     | 28.394         | 202.0          | 202.0          | 0.5                        | 0.08                      |
| Pyrene (Pyr)                           | Z-014G     | 29.381         | 202.0          | 202.0          | 0.5                        | 0.08                      |
| p-Terphenyl-d <sub>14</sub> (PAH-SS2)  | M-525-FS-2 | 30.586         | 244.0          | 244.0          | 0.5                        | 0.08                      |
| Retene (Ret)                           | Dr. E      | 31.090         | 219.0, 234.0   | 219.0          | 2.0                        | 0.33                      |
| Benzo[c]phenanthrene (BcP)             | H-244S     | 34.136         | 228.0          | 228.0          | 1.0                        | 0.17                      |
| Cyclopenta[c,d]pyrene (CcdP)           | H-242S     | 34.988         | 226.0          | 226.0          | 1.0                        | 0.17                      |
| Benz[a]anthracene (BaA)                | Z-014G     | 35.135         | 228.0          | 228.0          | 1.0                        | 0.17                      |
| Chrysene-d <sub>12</sub> (PAH-IS4)     | Z-014J-4   | 35.135         | 240.0          | 240.0          |                            |                           |
| Chrysene (Chr)                         | Z-014G     | 35.262         | 228.0          | 228.0          | 1.0                        | 0.17                      |
| Benzo[b]fluoranthene (BbF)             | Z-014G     | 39.870         | 252.0          | 252.0          | 1.0                        | 0.17                      |
| Benzo[k]fluoranthene (BkF)             | Z-014G     | 39.999         | 252.0          | 252.0          | 1.0                        | 0.17                      |
| Benzo[e]pyrene (BeP)                   | H-112S     | 41.111         | 252.0          | 252.0          | 1.0                        | 0.17                      |
| Benzo[a]pyrene (BaP)                   | Z-014G     | 41.361         | 252.0          | 252.0          | 1.0                        | 0.17                      |
| Perylene-d <sub>12</sub> (PAH-IS5)     | Z-014J-5   | 41.666         | 264.0          | 264.0          |                            |                           |
| Perylene (Per)                         | H-121S     | 41.790         | 252.0          | 252.0          | 1.0                        | 0.17                      |
| Indeno[1,2,3-cd]pyrene (IcdP)          | Z-014G     | 47.061         | 276.0          | 276.0          | 1.0                        | 0.17                      |
| Dibenz[a,h]anthracene (DahA)           | Z-014G     | 47.270         | 278.0          | 278.0          | 1.0                        | 0.17                      |
| Benzo[g,h,i]perylene (BghiP)           | Z-014G     | 48.175         | 276.0          | 276.0          | 1.0                        | 0.17                      |
| Anthanthrene (Antt)                    | H-109S     | 48.811         | 276.0          | 276.0          | 2.0                        | 0.33                      |
| Dibenzo[a,l]pyrene (DiBaIP)            | H-179S     | 53.351         | 302.0          | 302.0          | 2.0                        | 0.33                      |
| Dibenzo[a,e]fluoranthene (DiBaeF)      | H-247S     | 53.572         | 302.0          | 302.0          | 2.0                        | 0.33                      |
| Coronene (Cor)                         | H-116S     | 54.970         | 300.0          | 300.0          | 1.0                        | 0.17                      |
| di-benzo[a,e]pyrene (DiBaeP)           | H-138S     | 55.098         | 302.0          | 302.0          | 2.0                        | 0.33                      |
| di-benzo[a,i]pyrene (DiBaiP)           | H-178S     | 55.794         | 302.0          | 302.0          | 2.0                        | 0.33                      |
| di-benzo[a,h]pyrene (DiBahP)           | H-177S     | 56.154         | 302.0          | 302.0          | 2.0                        | 0.33                      |

Note: only retene was supplied by Dr. Ehrenstorfer GmbH, Germany, others were supplied by

AccuStandard Inc., NY, US with item number.

Table S2 Fragment ions for identification/quantification plus instrument limit of detection (LOD) and method limit of quantification (LOQ) of OCPs

| Analyte (abbreviation)           | Item No.   | Retention time | <i>m/z</i>     |                | LOD<br>ng mL <sup>-1</sup> | LOQ<br>ng g <sup>-1</sup> |
|----------------------------------|------------|----------------|----------------|----------------|----------------------------|---------------------------|
|                                  |            |                | Identification | Quantification |                            |                           |
| Pentachloronitrobenzene (OCP-IS) | M-508.1-IS | 20.057         | 248.9          | 248.9          |                            |                           |
| 1-Bromo-2-nitrobenzene (OCP-SS)  | M-8081-IS  | 12.064         | 79.1, 81.1     | 81.0           | 0.2                        | 0.03                      |
| α-HCH                            | AE-00010   | 18.794         | 71.0, 255.0    | 71.0           | 0.5                        | 0.08                      |
| Hexachlorbenzene (HCB)           | AE-00010   | 19.106         | 283.9, 285.8   | 283.9          | <0.05                      | 0.01                      |
| β-HCH                            | AE-00010   | 20.075         | 71.0, 255.0    | 71.0           | 0.5                        | 0.08                      |
| γ-HCH                            | AE-00010   | 20.320         | 71.0, 255.0    | 71.0           | 0.5                        | 0.08                      |
| δ-HCH                            | AE-00010   | 21.236         | 71.0, 255.0    | 71.0           | 0.5                        | 0.08                      |
| Heptachlor (HC)                  | AE-00010   | 23.877         | 237.0, 266.0   | 266.0          | 0.5                        | 0.08                      |
| Aldrin (Ald)                     | AE-00010   | 25.661         | 35.0, 237.0    | 237.0          | 0.5                        | 0.08                      |
| Isodrin (ID)                     | AE-00010   | 27.202         | 35.0, 237.0    | 35.0           | 0.2                        | 0.03                      |
| cis-Heptachlorepoxyde (cHCP)     | AE-00010   | 27.958         | 315.0, 388.0   | 388.0          | 5.0                        | 0.83                      |
| oxy-Chlordane (oCd)              | AE-00010   | 27.958         | 350.0, 424.0   | 424.0          | 5.0                        | 0.83                      |
| trans-Heptachlorepoxyde (tHCP)   | AE-00010   | 28.147         | 315.0, 388.0   | 388.0          | 5.0                        | 0.83                      |
| trans-Chlordane (tCd)            | AE-00010   | 29.219         | 300.0, 410.0   | 410.0          | 0.5                        | 0.08                      |
| o,p'-DDE                         | AE-00010   | 29.349         | 35.0, 246.0    | 246.0          | 1.0                        | 0.17                      |
| Endosulfan I (ES I)              | AE-00010   | 29.844         | 35.0, 406.0    | 406.0          | 0.5                        | 0.08                      |
| cis-Chlordane (cCd)              | AE-00010   | 30.076         | 300.0, 410.0   | 410.0          | 1.0                        | 0.17                      |
| Dieldrin (Dld)                   | AE-00010   | 31.315         | 35.0, 237.0    | 35.0           | 0.5                        | 0.08                      |
| p,p'-DDE                         | AE-00010   | 31.526         | 35.0, 37.0     | 35.0           | 0.5                        | 0.08                      |
| o,p'-DDD                         | AE-00010   | 31.961         | 35.0, 248.0    | 35.0           | 0.5                        | 0.08                      |
| Endrin (Ed)                      | AE-00010   | 31.484         | 35.0, 272.0    | 35.0           | 5.0                        | 0.83                      |
| Endosulfan II (ES II)            | AE-00010   | 33.058         | 370.0, 406.0   | 406.0          | 0.5                        | 0.08                      |
| p,p'-DDD                         | AE-00010   | 33.881         | 35.0, 248.0    | 35.0           | 5.0                        | 0.83                      |
| o,p'-DDT                         | AE-00010   | 34.005         | 35.0, 248.0    | 35.0           | 5.0                        | 0.83                      |
| p,p'-DDT                         | AE-00010   | 35.973         | 35.0, 71.0     | 35.0           | 0.5                        | 0.08                      |
| Methoxychlor (MOC)               | AE-00010   | 39.992         | 396.0, 398.0   | 396.0          | 0.5                        | 0.08                      |
| Mirex                            | AE-00010   | 41.020         | 35.0, 368.0    | 368.0          | 1.0                        | 0.17                      |

Note: all chemicals were supplied by AccuStandard Inc., NY, US with item number.

**Table S3** Fragment ions for identification/quantification plus instrument limit of detection (LOD) and method limit of quantification (LOQ) of PBDEs

| Analyte (abbreviation)                                                          | Item No.    | Retention time | <i>m/z</i>     |                | LOD<br>ng mL <sup>-1</sup> | LOQ<br>ng g <sup>-1</sup> |
|---------------------------------------------------------------------------------|-------------|----------------|----------------|----------------|----------------------------|---------------------------|
|                                                                                 |             |                | Identification | Quantification |                            |                           |
| 2, 2', 3, 3', 4, 5, 5', 6, 6'-NonaCB<br><sup>13</sup> C <sub>12</sub> (PBDE-IS) | EC-1419-1.2 | 16.528         | 473.8, 475.8   | 475.8          |                            |                           |
| 2, 2', 4-TriBDE (PBDE 17)                                                       | BDE-COC     | 10.726         | 79.1, 81.1     | 79.1           | 0.5                        | 0.08                      |
| 2, 4, 4'-TriBDE (PBDE 28)                                                       | BDE-COC     | 11.168         | 79.1, 81.1     | 81.1           | 0.5                        | 0.08                      |
| 2, 2', 3, 4, 5, 5'-HexaCB<br><sup>13</sup> C <sub>12</sub> (PBDE-SS)            | EC-1418-1.2 | 11.754         | 372.0, 374.0   | 372.0          | 0.5                        | 0.08                      |
| 2, 3', 4', 6-TetraBDE (PBDE 71)                                                 | BDE-COC     | 13.892         | 79.1, 81.1     | 79.1           | 0.5                        | 0.08                      |
| 2, 2', 4, 4'-TetraBDE (PBDE 47)                                                 | BDE-COC     | 14.794         | 79.1, 81.1     | 81.1           | 0.5                        | 0.08                      |
| 2, 3', 4, 4'-TetraBDE (PBDE 66)                                                 | BDE-COC     | 15.435         | 79.1, 81.1     | 79.1           | 0.5                        | 0.08                      |
| 2, 2', 4, 4', 6-PentaBDE (PBDE 100)                                             | BDE-COC     | 17.445         | 79.1, 81.1     | 79.1           | 0.5                        | 0.08                      |
| 2, 2', 4, 4', 5-PentaBDE (PBDE 99)                                              | BDE-COC     | 18.143         | 79.1, 81.1     | 79.1           | 0.5                        | 0.08                      |
| 2, 2', 3, 4, 4'-PentaBDE (PBDE 85)                                              | BDE-COC     | 19.320         | 79.1, 81.1     | 81.1           | 0.5                        | 0.08                      |
| 2, 2', 4, 4', 5, 6'-HexaBDE (PBDE 154)                                          | BDE-COC     | 19.550         | 79.1, 81.1     | 79.1           | 0.5                        | 0.08                      |
| 2, 2', 4, 4', 5, 5'-HexaBDE (PBDE 153)                                          | BDE-COC     | 20.346         | 79.1, 81.1     | 81.1           | 0.5                        | 0.08                      |
| 2, 2', 3, 4, 4', 5'-HexaBDE (PBDE 138)                                          | BDE-COC     | 21.304         | 79.1, 81.1     | 79.1           | 0.5                        | 0.08                      |
| 2, 2', 3, 4, 4', 5', 6-HeptaBDE (PBDE 183)                                      | BDE-COC     | 22.147         | 79.1, 81.1     | 81.1           | 0.5                        | 0.08                      |
| 2, 3, 3', 4, 4', 5, 6-HeptaBDE (PBDE 190)                                       | BDE-COC     | 23.255         | 79.1, 81.1     | 81.1           | 0.5                        | 0.08                      |
| DecaBDE (PBDE 209)                                                              | BDE-COC     | 30.473         | 486.6, 488.6   | 487.0          | 2.5                        | 0.42                      |

Note: IS and SS were supplied by Cambridge Isotope Laboratorie, Inc., US, others were supplied by

AccuStandard Inc., NY, US with item number. PCBs and PBDEs had the same IS and SS.

Table S4 Fragment ions for identification/quantification plus instrument limit of detection (LOD) and method limit of quantification (LOQ) of PCBs (MS1 and MS2 offer precursor ions and product ions, respectively)

| Analyte (abbreviation)                                                      | Item No.    | Retention time | <i>m/z</i>     |                |             | LOD ng mL <sup>-1</sup> | LOQ ng g <sup>-1</sup> |
|-----------------------------------------------------------------------------|-------------|----------------|----------------|----------------|-------------|-------------------------|------------------------|
|                                                                             |             |                | Identification | Quantification |             |                         |                        |
| 2, 2', 5-TriCB (PCB 18)                                                     | C-SCA-SET   | 18.684         | 258.0>186.0    | 186.0>151.0    | 186.0>151.0 | 0.5                     | 0.08                   |
| 2, 2', 3, 5'-TetraCB (PCB 44)                                               | C-SCA-SET   | 21.963         | 220.0>150.0    | 291.9>219.8    | 291.9>219.8 | 1                       | 0.17                   |
| 2, 2', 4, 5'-TetraCB (PCB 49)                                               | C-SCA-SET   | 22.106         | 220.0>150.0    | 291.9>219.8    | 291.9>219.8 | 0.5                     | 0.08                   |
| 2, 2', 5, 5'-TetraCB (PCB 52)                                               | C-SCA-SET   | 22.701         | 220.0>149.8    | 291.9>219.6    | 220.0>149.8 | 0.5                     | 0.08                   |
| 3, 4, 4'-TriCB (PCB 37)                                                     | C-SCA-SET   | 23.044         | 256.0>186.0    | 186.0>150.1    | 186.0>150.1 | 0.5                     | 0.08                   |
| 2, 3', 4', 5-TetraCB (PCB 70)                                               | C-SCA-SET   | 24.278         | 291.9>222.0    | 220.0>150.0    | 291.9>222.0 | 0.5                     | 0.08                   |
| 2, 4, 4', 5-TetraCB (PCB 74)                                                | C-SCA-SET   | 24.438         | 291.9>222.0    | 220.0>150.0    | 291.9>222.0 | 0.5                     | 0.08                   |
| 2, 2', 3, 4, 5'-PentaCB (PCB 87)                                            | C-SCA-SET   | 25.553         | 325.8>255.9    | 254.0>184.0    | 325.8>255.9 | 0.5                     | 0.08                   |
| 2, 2', 4, 4', 5-PentaCB (PCB 99)                                            | C-SCA-SET   | 25.739         | 325.8>255.9    | 254.0>184.0    | 325.8>255.9 | 0.5                     | 0.08                   |
| 2, 3, 4, 4', 5-PentaCB (PCB 114)                                            | C-SCA-SET   | 25.975         | 325.8>255.9    | 254.0>184.0    | 325.8>255.9 | 0.5                     | 0.08                   |
| 2, 2', 4, 5, 5'-PentaCB (PCB 101)                                           | C-SCA-SET   | 26.704         | 325.8>255.9    | 253.9>184.0    | 325.8>255.9 | 2.5                     | 0.42                   |
| 3, 4, 4', 5-TetraCB (PCB 81)                                                | C-SCA-SET   | 26.794         | 291.9>222.0    |                | 291.9>222.0 | 2.5                     | 0.42                   |
| 3, 3', 4, 4'-TetraCB (PCB 77)                                               | C-SCA-SET   | 27.273         | 290.0>220.0    |                | 290.0>220.0 | 1                       | 0.17                   |
| 2, 2', 3, 5, 5', 6-HexaCB (PCB 151)                                         | C-SCA-SET   | 27.628         | 290.0>220.0    | 359.8>290.0    | 359.8>290.0 | 0.5                     | 0.08                   |
| 2, 3', 4, 4', 6-PentaCB (PCB 119)                                           | C-SCA-SET   | 28.237         | 325.9>255.8    | 254.0>184.0    | 325.9>255.8 | 1                       | 0.17                   |
| 2, 3, 3', 4, 4'-PentaCB (PCB 105)                                           | C-SCA-SET   | 28.431         | 325.9>255.8    | 254.0>184.0    | 325.9>255.8 | 0.5                     | 0.08                   |
| 2', 3, 4, 4', 5-PentaCB (PCB 123)                                           | C-SCA-SET   | 28.961         | 325.9>255.8    | 254.0>184.0    | 325.9>255.8 | 1                       | 0.17                   |
| 2, 2', 4, 4', 5, 5'-HexaCB (PCB 153)                                        | C-SCA-SET   | 29.461         | 288.0>218.0    | 359.9>290.0    | 359.9>290.0 | 0.5                     | 0.08                   |
| 2, 3, 3', 4, 4', 6-HexaCB (PCB 157)                                         | C-SCA-SET   | 29.461         | 288.0>218.0    | 359.9>290.0    | 359.9>290.0 | 0.5                     | 0.08                   |
| 2, 3', 4, 4', 5-PentaCB (PCB 118)                                           | C-SCA-SET   | 29.613         | 325.9>256.0    |                | 325.9>256.0 | 2.5                     | 0.42                   |
| 2, 2', 3, 4, 5, 5'-HexaCB <sup>13</sup> C <sub>12</sub> (PCB-SS)            | EC-1418-1.2 | 30.051         | 372.0>302.0    |                | 372.0>302.0 | 0.5                     | 0.08                   |
| 2, 2', 3, 3', 4, 4'-HexaCB (PCB 128)                                        | C-SCA-SET   | 30.792         | 288.0>218.0    | 359.9>290.0    | 359.9>290.0 | 0.5                     | 0.08                   |
| 2, 3, 3', 4, 4', 5'-HexaCB (PCB 158)                                        | C-SCA-SET   | 30.792         | 288.0>218.0    | 359.9>290.0    | 359.9>290.0 | 0.5                     | 0.08                   |
| 3, 3', 4, 4', 5-PentaCB (PCB 126)                                           | C-SCA-SET   | 31.405         | 326.0>256.0    |                | 326.0>256.0 | 2.5                     | 0.42                   |
| 2, 2', 3, 4, 4', 5, 5'-HeptaCB (PCB 180)                                    | C-SCA-SET   | 31.485         | 395.7>325.6    |                | 395.7>325.6 | 2.5                     | 0.42                   |
| 2, 2', 3, 3', 4', 5, 6-HeptaCB (PCB 177)                                    | C-SCA-SET   | 31.758         | 395.7>325.6    |                | 395.7>325.6 | 2.5                     | 0.42                   |
| 2, 2', 3, 4, 4', 5'-HexaCB (PCB 138)                                        | C-SCA-SET   | 32.011         | 359.8>290.0    |                | 359.8>290.0 | 2.5                     | 0.42                   |
| 2, 3', 4, 4', 5, 5'-HexaCB (PCB 167)                                        | C-SCA-SET   | 32.266         | 359.8>290.0    |                | 359.8>290.0 | 2.5                     | 0.42                   |
| 2, 2', 3, 4', 5, 5', 6-HeptaCB (PCB 187)                                    | C-SCA-SET   | 32.890         | 393.8>323.8    | 395.7>323.9    | 395.7>323.9 | 1                       | 0.17                   |
| 2, 3, 3', 4, 4', 5-HexaCB (PCB 156)                                         | C-SCA-SET   | 33.335         | 359.8>290.0    |                | 359.8>290.0 | 2.5                     | 0.42                   |
| 2, 3', 4, 4', 5', 6-HexaCB (PCB 168)                                        | C-SCA-SET   | 33.577         | 359.8>290.0    |                | 359.8>290.0 | 2.5                     | 0.42                   |
| 2, 2', 3, 4, 4', 5', 6-HeptaCB (PCB 183)                                    | C-SCA-SET   | 34.183         | 393.8>323.8    | 395.7>323.9    | 393.8>323.8 | 2.5                     | 0.42                   |
| 3, 3', 4, 4', 5, 5'-HexaCB (PCB 169)                                        | C-SCA-SET   | 35.367         | 360.0>290.0    | 361.8>292.0    | 361.8>292.0 | 5                       | 0.83                   |
| 2, 2', 3, 3', 4, 4', 5-HeptaCB (PCB 170)                                    | C-SCA-SET   | 35.579         | 395.9>323.7    |                | 395.9>323.7 | 5                       | 0.83                   |
| 2, 2', 3, 3', 4, 5, 5', 6'-OctaCB (PCB 199)                                 | C-SCA-SET   | 35.962         | 360.0>290.0    | 427.8>357.7    | 360.0>290.0 | 5                       | 0.83                   |
| 2, 3, 3', 4, 4', 5, 5'-HeptaCB (PCB 189)                                    | C-SCA-SET   | 37.202         | 393.8>324.0    |                | 393.8>324.0 | 0.5                     | 0.08                   |
| 2, 2', 3, 3', 4, 5, 5', 6, 6'-NonaCB <sup>13</sup> C <sub>12</sub> (PCB-IS) | EC-1419-1.2 | 37.672         | 475.7>406.0    |                | 475.7>406.0 |                         |                        |
| 2, 2', 3, 3', 4, 4', 5, 5'-OctaCB (PCB 194)                                 | C-SCA-SET   | 38.964         | 427.7>357.9    |                | 427.7>357.9 | 0.5                     | 0.08                   |

Table S5 ANOVA and IST analysis of extracted target chemicals by EA/CH (1:1), DCM/HEX (4:1), and HEX/ACE (1:1) in blank fish meat

| Analytes      | Extract solvent (ng / 2 g) |        |        | TOHOV    | ANOVA        | IST (ES1 vs. ES2)    |                      |                      | IST (ES1 vs. ES3)    |                      |                      | IST (ES2 vs. ES3)    |                      |                      |
|---------------|----------------------------|--------|--------|----------|--------------|----------------------|----------------------|----------------------|----------------------|----------------------|----------------------|----------------------|----------------------|----------------------|
|               | ES1                        | ES2    | ES3    | <i>p</i> | <i>p</i>     | <i>p<sub>L</sub></i> | <i>p<sub>e</sub></i> | <i>p<sub>i</sub></i> | <i>p<sub>L</sub></i> | <i>p<sub>e</sub></i> | <i>p<sub>i</sub></i> | <i>p<sub>L</sub></i> | <i>p<sub>e</sub></i> | <i>p<sub>i</sub></i> |
| <b>PAHs</b>   |                            |        |        |          |              |                      |                      |                      |                      |                      |                      |                      |                      |                      |
| Nap           | 89.91                      | 91.84  | 99.75  | 0.258    | 0.287        | 0.131                | 0.616                | 0.547                | 0.217                | 0.261                | 0.216                | 0.399                | 0.266                | 0.290                |
| PAH-SS1       | 152.16                     | 152.76 | 147.35 | 0.253    | 0.570        | 0.695                | 0.869                | 0.882                | 0.328                | 0.543                | 0.480                | 0.184                | 0.383                | 0.411                |
| Any           | 2.95                       | 5.45   | 6.71   | 0.004    | 0.248        | 0.023                | 0.382                | 0.547                | 0.003                | 0.196                | 0.419                | 0.226                | 0.263                | 0.284                |
| Ace           | 14.63                      | 13.76  | 15.52  | 0.304    | 0.170        | 0.138                | 0.280                | 0.219                | 0.228                | 0.404                | 0.332                | 0.600                | 0.109                | 0.116                |
| Fle           | 51.32                      | 49.42  | 52.67  | 0.560    | 0.635        | 0.392                | 0.542                | 0.485                | 0.385                | 0.754                | 0.708                | 0.639                | 0.415                | 0.421                |
| Phe           | 118.99                     | 87.45  | 116.14 | 0.090    | 0.302        | 0.268                | 0.058                | 0.057                | 0.093                | 0.918                | 0.899                | 0.146                | 0.250                | 0.281                |
| Ant           | 11.22                      | 7.97   | 10.32  | 0.102    | 0.244        | 0.097                | 0.098                | 0.090                | 0.076                | 0.664                | 0.598                | 0.467                | 0.262                | 0.268                |
| Flu           | 51.28                      | 64.03  | 53.15  | 0.045    | 0.898        | 0.070                | 0.759                | 0.707                | 0.062                | 0.902                | 0.879                | 0.100                | 0.746                | 0.755                |
| Pyr           | 112.13                     | 108.72 | 78.05  | 0.150    | 0.526        | 0.202                | 0.939                | 0.925                | 0.473                | 0.094                | 0.087                | 0.147                | 0.403                | 0.435                |
| PAH-SS2       | 275.08                     | 245.13 | 224.71 | 0.073    | 0.089        | 0.149                | 0.024                | 0.114                | 0.195                | 0.110                | 0.081                | 0.060                | 0.298                | 0.347                |
| Baa           | 6.56                       | 6.15   | 5.19   | 0.122    | 0.845        | 0.276                | 0.904                | 0.891                | 0.304                | 0.429                | 0.533                | 0.086                | 0.698                | 0.710                |
| Chr           | 6.01                       | 6.00   | 5.47   | 0.078    | 0.962        | 0.167                | 0.998                | 0.998                | 0.558                | 0.639                | 0.684                | 0.067                | 0.831                | 0.839                |
| BbF           | 6.66                       | 4.81   | 4.57   | 0.001    | 0.292        | 0.010                | 0.329                | 0.524                | 0.000                | 0.261                | 0.487                | 0.247                | 0.614                | 0.627                |
| BkF           | 2.34                       | 2.70   | 1.10   | 0.022    | 0.425        | 0.172                | 0.843                | 0.814                | 0.000                | 0.093                | 0.317                | 0.020                | 0.266                | 0.325                |
| BaP           | 12.35                      | 22.12  | 18.78  | 0.025    | 0.654        | 0.063                | 0.501                | 0.428                | 0.103                | 0.123                | 0.097                | 0.041                | 0.759                | 0.771                |
| IcdP          | 1.30                       | 1.06   | 1.02   | 0.035    | 0.750        | 0.003                | 0.497                | 0.658                | 0.860                | 0.601                | 0.631                | 0.044                | 0.904                | 0.909                |
| DiahA         | 0.00                       | 0.00   | 0.00   | -        | -            | -                    | -                    | -                    | -                    | -                    | -                    | -                    | -                    | -                    |
| BghiP         | 2.86                       | 2.29   | 2.52   | 0.556    | 0.359        | 0.249                | 0.218                | 0.337                | 0.491                | 0.456                | 0.527                | 0.744                | 0.462                | 0.463                |
| <b>OCPs</b>   |                            |        |        |          |              |                      |                      |                      |                      |                      |                      |                      |                      |                      |
| OCP-SS        | 81.83                      | 75.90  | 82.61  | 0.146    | 0.686        | 0.514                | 0.342                | 0.348                | 0.219                | 0.939                | 0.940                | 0.103                | 0.496                | 0.517                |
| $\alpha$ -HCH | 5.86                       | 2.98   | 2.99   | 0.297    | 0.116        | 0.151                | 0.078                | 0.103                | 0.207                | 0.073                | 0.096                | 0.894                | 0.992                | 0.992                |
| <b>HCB</b>    | 4.83                       | 4.55   | 4.83   | 0.061    | <b>0.044</b> | 0.102                | 0.074                | 0.120                | 0.725                | 1.000                | 1.000                | 0.080                | 0.071                | 0.123                |
| $\beta$ -HCH  | 2.56                       | 1.98   | 1.95   | 0.527    | 0.369        | 0.586                | 0.208                | 0.213                | 0.280                | 0.249                | 0.263                | 0.591                | 0.960                | 0.960                |
| $\gamma$ -HCH | 1.08                       | 0.55   | 0.76   | 0.051    | 0.125        | 0.252                | 0.113                | 0.128                | 0.039                | 0.237                | 0.289                | 0.079                | 0.217                | 0.255                |
| $\delta$ -HCH | 0.31                       | 0.28   | 0.11   | 0.365    | 0.486        | 0.249                | 0.891                | 0.895                | 0.555                | 0.375                | 0.385                | 0.188                | 0.220                | 0.239                |



|              |        |        |        |       |       |       |       |       |       |       |       |       |       |       |
|--------------|--------|--------|--------|-------|-------|-------|-------|-------|-------|-------|-------|-------|-------|-------|
| HC           | 0.00   | 0.00   | 0.00   | -     | -     | -     | -     | -     | -     | -     | -     | -     | -     | -     |
| Ald          | 0.00   | 0.00   | 0.00   | -     | -     | -     | -     | -     | -     | -     | -     | -     | -     | -     |
| ID           | 0.16   | 0.25   | 0.00   | 0.064 | 0.311 | 0.311 | 0.658 | 0.666 | 0.039 | 0.127 | 0.195 | 0.053 | 0.201 | 0.266 |
| cHCP         | 0.00   | 0.00   | 0.00   | -     | -     | -     | -     | -     | -     | -     | -     | -     | -     | -     |
| oCd          | 0.00   | 0.00   | 0.00   | -     | -     | -     | -     | -     | -     | -     | -     | -     | -     | -     |
| tHCP         | 0.00   | 0.00   | 0.00   | -     | -     | -     | -     | -     | -     | -     | -     | -     | -     | -     |
| tCd          | 0.00   | 0.00   | 0.00   | -     | -     | -     | -     | -     | -     | -     | -     | -     | -     | -     |
| o,p'-DDE     | 0.00   | 0.00   | 0.00   | -     | -     | -     | -     | -     | -     | -     | -     | -     | -     | -     |
| ES I         | 1.80   | 1.11   | 1.61   | 0.018 | 0.389 | 0.046 | 0.297 | 0.341 | 0.558 | 0.359 | 0.362 | 0.036 | 0.429 | 0.466 |
| cCd          | 0.00   | 0.00   | 0.00   | -     | -     | -     | -     | -     | -     | -     | -     | -     | -     | -     |
| Dld          | 0.00   | 0.00   | 0.00   | -     | -     | -     | -     | -     | -     | -     | -     | -     | -     | -     |
| p,p'-DDE     | 12.37  | 12.18  | 12.52  | 0.436 | 0.812 | 0.232 | 0.727 | 0.732 | 0.464 | 0.759 | 0.761 | 0.600 | 0.593 | 0.594 |
| o,p'-DDD     | 2.09   | 2.08   | 2.15   | 0.080 | 0.918 | 0.289 | 0.967 | 0.968 | 0.039 | 0.767 | 0.779 | 0.179 | 0.603 | 0.620 |
| Ed           | 0.00   | 0.00   | 0.00   | -     | -     | -     | -     | -     | -     | -     | -     | -     | -     | -     |
| ES II        | 0.42   | 11.45  | 0.27   | 0.004 | 0.414 | 0.017 | 0.372 | 0.421 | 0.817 | 0.472 | 0.472 | 0.017 | 0.366 | 0.415 |
| p,p'-DDD     | 9.25   | 9.60   | 9.20   | 0.194 | 0.786 | 0.414 | 0.482 | 0.491 | 0.097 | 0.941 | 0.943 | 0.330 | 0.607 | 0.612 |
| o,p'-DDT     | 1.57   | 1.33   | 1.29   | 0.680 | 0.554 | 0.496 | 0.396 | 0.401 | 0.418 | 0.329 | 0.335 | 0.939 | 0.889 | 0.889 |
| p,p'-DDT     | 2.20   | 0.86   | 0.94   | 0.146 | 0.296 | 0.056 | 0.213 | 0.258 | 0.365 | 0.111 | 0.139 | 0.312 | 0.947 | 0.947 |
| MOC          | 0.00   | 0.00   | 0.00   | -     | -     | -     | -     | -     | -     | -     | -     | -     | -     | -     |
| Mirex        | 0.00   | 0.00   | 0.00   | -     | -     | -     | -     | -     | -     | -     | -     | -     | -     | -     |
| <b>PBDEs</b> |        |        |        |       |       |       |       |       |       |       |       |       |       |       |
| PBDE 17      | 0.00   | 0.00   | 0.00   | -     | -     | -     | -     | -     | -     | -     | -     | -     | -     | -     |
| PBDE 28      | 0.25   | 0.22   | 0.18   | 0.100 | 0.571 | 0.090 | 0.634 | 0.653 | 0.409 | 0.116 | 0.129 | 0.174 | 0.680 | 0.690 |
| PBDE-SS      | 103.93 | 100.33 | 100.23 | 0.425 | 0.112 | 0.459 | 0.125 | 0.132 | 0.235 | 0.098 | 0.119 | 0.630 | 0.946 | 0.947 |
| PBDE 71      | 0.00   | 0.00   | 0.00   | -     | -     | -     | -     | -     | -     | -     | -     | -     | -     | -     |
| PBDE 47      | 0.63   | 0.50   | 0.48   | 0.533 | 0.244 | 0.305 | 0.220 | 0.234 | 0.670 | 0.109 | 0.112 | 0.531 | 0.815 | 0.816 |
| PBDE 66      | 0.00   | 0.00   | 0.00   | -     | -     | -     | -     | -     | -     | -     | -     | -     | -     | -     |
| PBDE 100     | 0.00   | 0.00   | 0.00   | -     | -     | -     | -     | -     | -     | -     | -     | -     | -     | -     |
| PBDE 99      | 0.00   | 0.00   | 0.00   | -     | -     | -     | -     | -     | -     | -     | -     | -     | -     | -     |
| PBDE 85      | 0.00   | 0.00   | 0.00   | -     | -     | -     | -     | -     | -     | -     | -     | -     | -     | -     |

|                 |       |       |       |       |       |       |       |       |              |              |              |       |       |       |
|-----------------|-------|-------|-------|-------|-------|-------|-------|-------|--------------|--------------|--------------|-------|-------|-------|
| PBDE 154        | 0.09  | 0.09  | 0.10  | 0.169 | 0.847 | 0.823 | 0.882 | 0.882 | 0.145        | 0.539        | 0.566        | 0.057 | 0.692 | 0.708 |
| PBDE 153        | 0.00  | 0.00  | 0.00  | -     | -     | -     | -     | -     | -            | -            | -            | -     | -     | -     |
| PBDE 138        | 0.66  | 0.75  | 0.52  | 0.079 | 0.559 | 0.201 | 0.727 | 0.732 | 0.219        | 0.340        | 0.359        | 0.061 | 0.361 | 0.398 |
| PBDE 183        | 0.00  | 0.00  | 0.00  | -     | -     | -     | -     | -     | -            | -            | -            | -     | -     | -     |
| PBDE 190        | 0.00  | 0.00  | 0.00  | -     | -     | -     | -     | -     | -            | -            | -            | -     | -     | -     |
| <b>PBDE 209</b> | 2.26  | 4.96  | 3.01  | 0.070 | 0.092 | 0.110 | 0.099 | 0.165 | <b>0.423</b> | <b>0.002</b> | <b>0.002</b> | 0.104 | 0.197 | 0.261 |
| <b>PCBs</b>     |       |       |       |       |       |       |       |       |              |              |              |       |       |       |
| PCB 18          | 0.15  | 0.21  | 0.23  | 0.831 | 0.097 | 0.731 | 0.114 | 0.116 | 0.595        | 0.078        | 0.064        | 0.764 | 0.448 | 0.45  |
| PCB 44          | 0.00  | 0.00  | 0.07  | 0.011 | 0.507 | -     | -     | -     | 0.053        | 0.495        | 0.423        | 0.016 | 0.374 | 0.423 |
| PCB 49          | 0.15  | 0.29  | 0.10  | 0.131 | 0.352 | 0.235 | 0.454 | 0.547 | 0.056        | 0.727        | 0.797        | 0.361 | 0.125 | 0.135 |
| <b>PCB 52</b>   | 0.00  | 0.07  | 0.10  | 0.025 | 0.414 | 0.053 | 0.495 | 0.423 | <b>0.118</b> | <b>0.022</b> | <b>0.03</b>  | 0.048 | 0.654 | 0.671 |
| PCB 37          | 0.00  | 0.13  | 0.08  | 0.054 | 0.321 | 0.056 | 0.220 | 0.184 | 0.056        | 0.22         | 0.184        | 0.276 | 0.556 | 0.562 |
| PCB 70          | 0.00  | 0.00  | 0.04  | 0.011 | 0.507 | -     | -     | -     | 0.053        | 0.495        | 0.423        | 0.016 | 0.374 | 0.423 |
| PCB 74          | 0.00  | 0.10  | 0.04  | 0.093 | 0.363 | 0.085 | 0.229 | 0.191 | 0.053        | 0.495        | 0.423        | 0.619 | 0.41  | 0.413 |
| <b>PCB 87</b>   | 0.00  | 0.05  | 0.16  | 0.031 | 0.079 | 0.053 | 0.495 | 0.423 | <b>0.058</b> | <b>0.009</b> | <b>0.016</b> | 0.082 | 0.134 | 0.173 |
| <b>PCB 99</b>   | 0.00  | 0.04  | 0.12  | 0.028 | 0.087 | 0.053 | 0.495 | 0.423 | <b>0.193</b> | <b>0.004</b> | <b>0.009</b> | 0.052 | 0.149 | 0.199 |
| PCB 114         | 0.00  | 0.00  | 0.00  | -     | -     | -     | -     | -     | -            | -            | -            | -     | -     | -     |
| PCB 101         | 0.00  | 0.07  | 0.05  | 0.076 | 0.351 | 0.063 | 0.222 | 0.186 | 0.067        | 0.223        | 0.187        | 0.507 | 0.717 | 0.718 |
| PCB 81          | 0.00  | 0.00  | 0.00  | -     | -     | -     | -     | -     | -            | -            | -            | -     | -     | -     |
| PCB 77          | 0.00  | 0.07  | 0.07  | 0.044 | 0.641 | 0.053 | 0.495 | 0.423 | 0.078        | 0.226        | 0.189        | 0.146 | 0.977 | 0.977 |
| PCB 151         | 0.00  | 0.00  | 0.00  | -     | -     | -     | -     | -     | -            | -            | -            | -     | -     | -     |
| PCB 119         | 0.00  | 0.00  | 0.00  | -     | -     | -     | -     | -     | -            | -            | -            | -     | -     | -     |
| PCB 105         | 0.00  | 0.10  | 0.12  | 0.156 | 0.382 | 0.118 | 0.239 | 0.199 | 0.101        | 0.233        | 0.195        | 0.704 | 0.803 | 0.804 |
| PCB 123         | 0.00  | 0.00  | 0.00  | -     | -     | -     | -     | -     | -            | -            | -            | -     | -     | -     |
| PCB 153/157     | 0.00  | 0.04  | 0.11  | 0.081 | 0.355 | 0.053 | 0.495 | 0.423 | 0.074        | 0.225        | 0.188        | 0.58  | 0.401 | 0.404 |
| PCB 118         | 0.00  | 0.00  | 0.00  | -     | -     | -     | -     | -     | -            | -            | -            | -     | -     | -     |
| PCB-SS          | 44.95 | 59.82 | 64.78 | 0.001 | 0.005 | 0.000 | 0.030 | 0.210 | 0.017        | 0.019        | 0.138        | 0.021 | 0.028 | 0.077 |
| PCB 128/158     | 0.07  | 0.04  | 0.14  | 0.020 | 0.265 | 0.760 | 0.797 | 0.815 | 0.001        | 0.236        | 0.462        | 0.03  | 0.103 | 0.163 |
| PCB 126         | 0.00  | 0.00  | 0.00  | -     | -     | -     | -     | -     | -            | -            | -            | -     | -     | -     |
| PCB 180         | 0.00  | 0.00  | 0.00  | -     | -     | -     | -     | -     | -            | -            | -            | -     | -     | -     |

|         |      |      |      |   |   |   |   |   |   |   |   |   |   |   |
|---------|------|------|------|---|---|---|---|---|---|---|---|---|---|---|
| PCB 177 | 0.00 | 0.00 | 0.00 | - | - | - | - | - | - | - | - | - | - | - |
| PCB 138 | 0.00 | 0.00 | 0.00 | - | - | - | - | - | - | - | - | - | - | - |
| PCB 167 | 0.00 | 0.00 | 0.00 | - | - | - | - | - | - | - | - | - | - | - |
| PCB 187 | 0.00 | 0.00 | 0.00 | - | - | - | - | - | - | - | - | - | - | - |
| PCB 156 | 0.00 | 0.00 | 0.00 | - | - | - | - | - | - | - | - | - | - | - |
| PCB 168 | 0.00 | 0.00 | 0.00 | - | - | - | - | - | - | - | - | - | - | - |
| PCB 183 | 0.00 | 0.00 | 0.00 | - | - | - | - | - | - | - | - | - | - | - |
| PCB 169 | 0.00 | 0.00 | 0.00 | - | - | - | - | - | - | - | - | - | - | - |
| PCB 170 | 0.00 | 0.00 | 0.00 | - | - | - | - | - | - | - | - | - | - | - |
| PCB 199 | 0.00 | 0.00 | 0.00 | - | - | - | - | - | - | - | - | - | - | - |
| PCB 189 | 0.00 | 0.00 | 0.00 | - | - | - | - | - | - | - | - | - | - | - |
| PCB 194 | 0.00 | 0.00 | 0.00 | - | - | - | - | - | - | - | - | - | - | - |

Notes: ES1 – EA/CH (1:1), ES2 – DCM/HEX (4:1), ES3 – HEX/ACE(1:1), TOHOV –Test of homogeneity of variances, ANOVA – analysis of variances, IST –Independent sample test,  $p_L$  – Significance of the Levene' test,  $p_e$  – Significance of IST when variances are equal,  $p_i$  – Significance of IST when variances are unequal, “-“ means the dataset is not suitable to be tested.

Table S6 ANOVA and IST analysis of extracted target chemicals by EA/CH (1:1), DCM/HEX (4:1), and HEX/ACE (1:1) in spiked fish meat

| Analytes      | Extract solvent (ng / 2 g) |        |        | TOHOV    | ANOVA    | IST (ES1 vs. ES2)    |                      |                      | IST (ES1 vs. ES3)    |                      |                      | IST (ES2 vs. ES3)    |                      |                      |
|---------------|----------------------------|--------|--------|----------|----------|----------------------|----------------------|----------------------|----------------------|----------------------|----------------------|----------------------|----------------------|----------------------|
|               | ES1                        | ES2    | ES3    | <i>p</i> | <i>p</i> | <i>p<sub>L</sub></i> | <i>p<sub>e</sub></i> | <i>p<sub>i</sub></i> | <i>p<sub>L</sub></i> | <i>p<sub>e</sub></i> | <i>p<sub>i</sub></i> | <i>p<sub>L</sub></i> | <i>p<sub>e</sub></i> | <i>p<sub>i</sub></i> |
| <b>PAHs</b>   |                            |        |        |          |          |                      |                      |                      |                      |                      |                      |                      |                      |                      |
| Nap           | 221.74                     | 243.18 | 232.58 | 0.092    | 0.240    | 0.076                | 0.110                | 0.099                | 0.066                | 0.380                | 0.315                | 0.781                | 0.390                | 0.390                |
| PAH-SS1       | 160.47                     | 153.66 | 149.58 | 0.098    | 0.738    | 0.894                | 0.356                | 0.364                | 0.155                | 0.560                | 0.489                | 0.095                | 0.774                | 0.783                |
| Any           | 125.24                     | 131.39 | 134.66 | 0.171    | 0.224    | 0.912                | 0.078                | 0.101                | 0.229                | 0.198                | 0.151                | 0.147                | 0.512                | 0.534                |
| Ace           | 150.62                     | 154.67 | 151.62 | 0.062    | 0.332    | 0.190                | 0.312                | 0.453                | 0.003                | 0.748                | 0.830                | 0.340                | 0.135                | 0.171                |
| Fle           | 210.31                     | 218.77 | 211.65 | 0.177    | 0.865    | 0.187                | 0.712                | 0.659                | 0.621                | 0.908                | 0.904                | 0.177                | 0.700                | 0.709                |
| Phe           | 245.97                     | 277.69 | 261.64 | 0.028    | 0.872    | 0.086                | 0.707                | 0.648                | 0.960                | 0.426                | 0.454                | 0.033                | 0.802                | 0.812                |
| Ant           | 153.72                     | 155.39 | 152.05 | 0.048    | 0.895    | 0.138                | 0.878                | 0.851                | 0.308                | 0.545                | 0.629                | 0.045                | 0.688                | 0.706                |
| Flu           | 237.78                     | 235.67 | 230.85 | 0.039    | 0.970    | 0.174                | 0.960                | 0.952                | 0.049                | 0.624                | 0.728                | 0.033                | 0.875                | 0.881                |
| Pyr           | 242.91                     | 251.36 | 238.03 | 0.661    | 0.792    | 0.446                | 0.734                | 0.715                | 0.672                | 0.814                | 0.814                | 0.602                | 0.540                | 0.542                |
| PAH-SS2       | 181.59                     | 174.35 | 168.09 | 0.015    | 0.223    | 0.022                | 0.427                | 0.584                | 0.017                | 0.187                | 0.379                | 0.921                | 0.172                | 0.172                |
| Baa           | 205.64                     | 206.10 | 204.22 | 0.097    | 0.887    | 0.057                | 0.813                | 0.861                | 0.249                | 0.815                | 0.780                | 0.074                | 0.679                | 0.698                |
| Chr           | 96.60                      | 98.41  | 98.65  | 0.125    | 0.812    | 0.757                | 0.380                | 0.360                | 0.149                | 0.641                | 0.577                | 0.124                | 0.944                | 0.946                |
| BbF           | 195.90                     | 196.19 | 187.34 | 0.071    | 0.403    | 0.999                | 0.977                | 0.978                | 0.004                | 0.244                | 0.455                | 0.070                | 0.211                | 0.262                |
| BkF           | 166.39                     | 164.46 | 156.81 | 0.029    | 0.285    | 0.791                | 0.816                | 0.820                | 0.001                | 0.119                | 0.344                | 0.030                | 0.192                | 0.252                |
| <b>BaP</b>    | 202.35                     | 211.35 | 200.74 | 0.017    | 0.008    | 0.046                | 0.048                | 0.183                | 0.010                | 0.577                | 0.701                | <b>0.378</b>         | <b>0.002</b>         | <b>0.003</b>         |
| IcdP          | 142.41                     | 142.56 | 140.10 | 0.500    | 0.715    | 0.246                | 0.967                | 0.973                | 0.949                | 0.606                | 0.631                | 0.382                | 0.456                | 0.461                |
| DiahA         | 66.92                      | 68.02  | 66.47  | 0.985    | 0.832    | 0.872                | 0.722                | 0.730                | 0.883                | 0.888                | 0.889                | 0.982                | 0.580                | 0.580                |
| BghiP         | 85.44                      | 86.86  | 85.99  | 0.465    | 0.904    | 0.398                | 0.617                | 0.588                | 0.326                | 0.885                | 0.866                | 0.522                | 0.795                | 0.796                |
| <b>OCPs</b>   |                            |        |        |          |          |                      |                      |                      |                      |                      |                      |                      |                      |                      |
| <b>OCP-SS</b> | 72.76                      | 66.63  | 83.76  | 0.418    | 0.013    | 0.740                | 0.253                | 0.254                | <b>0.366</b>         | <b>0.032</b>         | <b>0.050</b>         | <b>0.170</b>         | <b>0.010</b>         | <b>0.024</b>         |
| $\alpha$ -HCH | 51.44                      | 54.94  | 51.21  | 0.053    | 0.386    | 0.063                | 0.343                | 0.390                | 0.245                | 0.855                | 0.858                | 0.117                | 0.331                | 0.367                |
| HCB           | 50.60                      | 50.50  | 50.02  | 0.591    | 0.622    | 0.808                | 0.856                | 0.856                | 0.506                | 0.431                | 0.435                | 0.384                | 0.495                | 0.501                |
| $\beta$ -HCH  | 43.74                      | 46.11  | 46.03  | 0.038    | 0.579    | 0.056                | 0.464                | 0.502                | 0.089                | 0.488                | 0.519                | 0.214                | 0.913                | 0.915                |
| $\gamma$ -HCH | 45.59                      | 47.00  | 47.02  | 0.071    | 0.452    | 0.095                | 0.377                | 0.410                | 0.097                | 0.372                | 0.404                | 0.847                | 0.976                | 0.976                |
| $\delta$ -HCH | 39.61                      | 40.12  | 40.75  | 0.114    | 0.879    | 0.146                | 0.855                | 0.860                | 0.115                | 0.680                | 0.693                | 0.887                | 0.630                | 0.631                |

|                 |        |        |        |       |       |              |              |              |       |       |       |              |              |              |
|-----------------|--------|--------|--------|-------|-------|--------------|--------------|--------------|-------|-------|-------|--------------|--------------|--------------|
| HC              | 49.95  | 50.66  | 50.83  | 0.920 | 0.663 | 0.795        | 0.496        | 0.496        | 0.891 | 0.445 | 0.445 | 0.713        | 0.873        | 0.873        |
| Ald             | 53.88  | 53.33  | 51.95  | 0.490 | 0.388 | 0.679        | 0.743        | 0.743        | 0.457 | 0.156 | 0.181 | 0.225        | 0.348        | 0.375        |
| ID              | 47.91  | 41.81  | 46.05  | 0.009 | 0.472 | 0.033        | 0.355        | 0.400        | 0.316 | 0.183 | 0.207 | 0.022        | 0.503        | 0.538        |
| cHCP            | 39.69  | 46.85  | 47.50  | 0.107 | 0.344 | 0.251        | 0.123        | 0.150        | 0.062 | 0.246 | 0.291 | 0.269        | 0.925        | 0.926        |
| oCd             | 48.94  | 50.49  | 51.09  | 0.050 | 0.769 | 0.573        | 0.369        | 0.378        | 0.097 | 0.580 | 0.596 | 0.049        | 0.868        | 0.875        |
| tHCP            | 42.98  | 45.46  | 45.19  | 0.261 | 0.467 | 0.361        | 0.194        | 0.204        | 0.162 | 0.363 | 0.386 | 0.404        | 0.916        | 0.917        |
| tCd             | 45.16  | 47.75  | 42.74  | 0.020 | 0.375 | 0.828        | 0.084        | 0.084        | 0.044 | 0.574 | 0.599 | 0.042        | 0.273        | 0.323        |
| o,p'-DDE        | 52.12  | 52.48  | 51.87  | 0.791 | 0.942 | 0.765        | 0.844        | 0.844        | 0.588 | 0.901 | 0.890 | 0.553        | 0.719        | 0.711        |
| ES I            | 51.13  | 51.73  | 50.81  | 0.220 | 0.752 | 0.217        | 0.685        | 0.693        | 0.183 | 0.827 | 0.832 | 0.986        | 0.310        | 0.311        |
| cCd             | 45.18  | 45.52  | 44.52  | 0.196 | 0.722 | 0.459        | 0.827        | 0.829        | 0.107 | 0.631 | 0.650 | 0.217        | 0.311        | 0.344        |
| Dld             | 68.52  | 68.28  | 67.28  | 0.341 | 0.852 | 0.542        | 0.934        | 0.934        | 0.206 | 0.628 | 0.642 | 0.289        | 0.597        | 0.604        |
| p,p'-DDE        | 58.12  | 58.15  | 55.71  | 0.457 | 0.245 | 0.190        | 0.983        | 0.983        | 0.608 | 0.229 | 0.232 | 0.513        | 0.122        | 0.139        |
| o,p'-DDD        | 47.49  | 47.61  | 46.50  | 0.210 | 0.691 | 0.364        | 0.946        | 0.947        | 0.158 | 0.554 | 0.582 | 0.155        | 0.208        | 0.245        |
| Ed              | 54.20  | 53.43  | 53.16  | 0.240 | 0.785 | 0.244        | 0.691        | 0.704        | 0.227 | 0.588 | 0.608 | 0.966        | 0.740        | 0.740        |
| <b>ES II</b>    | 45.49  | 44.61  | 46.71  | 0.010 | 0.506 | 0.031        | 0.693        | 0.711        | 0.026 | 0.585 | 0.611 | <b>0.696</b> | <b>0.009</b> | <b>0.010</b> |
| p,p'-DDD        | 63.35  | 62.22  | 61.54  | 0.814 | 0.708 | 0.662        | 0.650        | 0.654        | 0.632 | 0.474 | 0.481 | 0.916        | 0.719        | 0.719        |
| <b>o,p'-DDT</b> | 57.32  | 58.32  | 53.50  | 0.110 | 0.148 | 0.081        | 0.693        | 0.704        | 0.225 | 0.212 | 0.228 | <b>0.287</b> | <b>0.034</b> | <b>0.043</b> |
| p,p'-DDT        | 50.80  | 49.90  | 48.67  | 0.047 | 0.282 | 0.193        | 0.572        | 0.582        | 0.038 | 0.180 | 0.239 | 0.097        | 0.157        | 0.203        |
| MOC             | 44.87  | 50.10  | 46.90  | 0.232 | 0.959 | 0.424        | 0.824        | 0.827        | 0.136 | 0.922 | 0.926 | 0.268        | 0.796        | 0.804        |
| Mirex           | 43.74  | 43.84  | 45.00  | 0.083 | 0.838 | 0.269        | 0.972        | 0.973        | 0.038 | 0.632 | 0.653 | 0.219        | 0.495        | 0.518        |
| <b>PBDEs</b>    |        |        |        |       |       |              |              |              |       |       |       |              |              |              |
| PBDE 17         | 26.25  | 27.22  | 27.20  | 0.662 | 0.184 | 0.490        | 0.160        | 0.180        | 0.863 | 0.077 | 0.077 | 0.546        | 0.965        | 0.966        |
| PBDE 28         | 26.69  | 27.41  | 27.44  | 0.243 | 0.331 | 0.653        | 0.306        | 0.308        | 0.241 | 0.156 | 0.188 | 0.104        | 0.950        | 0.951        |
| <b>PBDE-SS</b>  | 102.98 | 106.58 | 104.77 | 0.088 | 0.060 | <b>0.053</b> | <b>0.044</b> | <b>0.087</b> | 0.186 | 0.089 | 0.120 | 0.272        | 0.267        | 0.281        |
| PBDE 71         | 25.98  | 26.20  | 26.46  | 0.159 | 0.552 | 0.828        | 0.684        | 0.684        | 0.082 | 0.279 | 0.333 | 0.100        | 0.498        | 0.531        |
| PBDE 47         | 25.44  | 25.71  | 26.08  | 0.581 | 0.450 | 0.562        | 0.638        | 0.642        | 0.396 | 0.274 | 0.295 | 0.621        | 0.376        | 0.378        |
| PBDE 66         | 27.66  | 27.61  | 28.23  | 0.517 | 0.676 | 0.633        | 0.956        | 0.957        | 0.323 | 0.504 | 0.519 | 0.430        | 0.357        | 0.365        |
| PBDE 100        | 23.26  | 23.19  | 23.73  | 0.645 | 0.541 | 0.681        | 0.912        | 0.913        | 0.410 | 0.413 | 0.428 | 0.575        | 0.261        | 0.268        |
| PBDE 99         | 23.28  | 22.90  | 23.82  | 0.396 | 0.588 | 0.326        | 0.710        | 0.716        | 0.318 | 0.602 | 0.611 | 0.928        | 0.215        | 0.215        |
| PBDE 85         | 28.22  | 27.53  | 29.12  | 0.235 | 0.524 | 0.147        | 0.660        | 0.669        | 0.224 | 0.580 | 0.588 | 0.975        | 0.176        | 0.178        |

|               |        |        |        |       |       |       |       |       |              |              |              |       |       |       |
|---------------|--------|--------|--------|-------|-------|-------|-------|-------|--------------|--------------|--------------|-------|-------|-------|
| PBDE 154      | 22.98  | 22.44  | 23.45  | 0.517 | 0.521 | 0.218 | 0.556 | 0.565 | 0.526        | 0.643        | 0.644        | 0.718 | 0.231 | 0.239 |
| PBDE 153      | 21.98  | 21.35  | 22.57  | 0.249 | 0.587 | 0.119 | 0.615 | 0.629 | 0.415        | 0.679        | 0.682        | 0.401 | 0.228 | 0.247 |
| PBDE 138      | 26.85  | 25.73  | 27.09  | 0.094 | 0.668 | 0.050 | 0.499 | 0.533 | 0.602        | 0.907        | 0.907        | 0.077 | 0.318 | 0.367 |
| PBDE 183      | 24.89  | 23.63  | 24.53  | 0.131 | 0.722 | 0.089 | 0.456 | 0.496 | 0.700        | 0.859        | 0.860        | 0.056 | 0.481 | 0.518 |
| PBDE 190      | 18.98  | 17.37  | 18.28  | 0.257 | 0.586 | 0.157 | 0.354 | 0.391 | 0.530        | 0.714        | 0.717        | 0.204 | 0.447 | 0.467 |
| PBDE 209      | 189.13 | 165.48 | 195.69 | 0.096 | 0.709 | 0.034 | 0.517 | 0.547 | 0.821        | 0.892        | 0.892        | 0.092 | 0.396 | 0.436 |
| <b>PCBs</b>   |        |        |        |       |       |       |       |       |              |              |              |       |       |       |
| PCB 18        | 25.14  | 25.71  | 25.96  | 0.415 | 0.681 | 0.510 | 0.617 | 0.621 | 0.462        | 0.325        | 0.331        | 0.260 | 0.810 | 0.814 |
| PCB 44        | 28.52  | 29.03  | 29.75  | 0.290 | 0.623 | 0.277 | 0.735 | 0.741 | 0.832        | 0.209        | 0.211        | 0.217 | 0.622 | 0.635 |
| PCB 49        | 25.34  | 25.45  | 25.29  | 0.533 | 0.984 | 0.343 | 0.915 | 0.916 | 0.712        | 0.950        | 0.950        | 0.472 | 0.880 | 0.881 |
| PCB 52        | 29.90  | 29.99  | 29.87  | 0.088 | 0.992 | 0.143 | 0.947 | 0.950 | 0.351        | 0.926        | 0.927        | 0.107 | 0.924 | 0.928 |
| PCB 37        | 60.87  | 64.08  | 64.76  | 0.102 | 0.373 | 0.081 | 0.342 | 0.392 | 0.070        | 0.063        | 0.115        | 0.313 | 0.848 | 0.851 |
| PCB 70        | 34.80  | 37.18  | 37.48  | 0.364 | 0.202 | 0.233 | 0.191 | 0.236 | 0.292        | 0.053        | 0.072        | 0.520 | 0.871 | 0.872 |
| <b>PCB 74</b> | 34.76  | 37.28  | 37.80  | 0.214 | 0.128 | 0.167 | 0.167 | 0.225 | <b>0.119</b> | <b>0.014</b> | <b>0.030</b> | 0.362 | 0.763 | 0.769 |
| PCB 87        | 39.47  | 40.61  | 40.42  | 0.055 | 0.728 | 0.078 | 0.550 | 0.573 | 0.801        | 0.262        | 0.262        | 0.088 | 0.921 | 0.924 |
| <b>PCB 99</b> | 32.33  | 33.20  | 33.84  | 0.249 | 0.339 | 0.249 | 0.472 | 0.494 | <b>0.915</b> | <b>0.047</b> | <b>0.048</b> | 0.226 | 0.583 | 0.601 |
| PCB 114       | 29.70  | 31.42  | 31.29  | 0.504 | 0.357 | 0.340 | 0.241 | 0.273 | 0.218        | 0.169        | 0.187        | 0.735 | 0.933 | 0.933 |
| PCB 101       | 31.01  | 32.43  | 32.07  | 0.558 | 0.651 | 0.692 | 0.450 | 0.452 | 0.340        | 0.528        | 0.535        | 0.482 | 0.805 | 0.806 |
| PCB 81        | 39.00  | 41.32  | 41.41  | 0.382 | 0.585 | 0.255 | 0.444 | 0.458 | 0.942        | 0.277        | 0.278        | 0.323 | 0.977 | 0.977 |
| PCB 77        | 39.12  | 42.12  | 43.26  | 0.729 | 0.171 | 0.504 | 0.214 | 0.226 | 0.814        | 0.067        | 0.068        | 0.631 | 0.622 | 0.624 |
| PCB 151       | 27.34  | 28.32  | 28.18  | 0.397 | 0.483 | 0.330 | 0.270 | 0.304 | 0.098        | 0.305        | 0.335        | 0.915 | 0.893 | 0.893 |
| PCB 119       | 31.05  | 32.63  | 33.67  | 0.571 | 0.215 | 0.354 | 0.290 | 0.308 | 0.373        | 0.084        | 0.095        | 0.800 | 0.523 | 0.524 |
| PCB 105       | 31.97  | 34.18  | 34.45  | 0.569 | 0.147 | 0.410 | 0.122 | 0.144 | 0.242        | 0.075        | 0.090        | 0.978 | 0.846 | 0.846 |
| PCB 123       | 31.39  | 33.13  | 33.88  | 0.480 | 0.367 | 0.335 | 0.328 | 0.347 | 0.215        | 0.168        | 0.187        | 0.983 | 0.713 | 0.713 |
| PCB 153/157   | 29.29  | 30.65  | 30.48  | 0.583 | 0.595 | 0.718 | 0.327 | 0.331 | 0.293        | 0.443        | 0.452        | 0.560 | 0.916 | 0.916 |
| PCB 118       | 34.04  | 35.67  | 36.21  | 0.231 | 0.427 | 0.177 | 0.349 | 0.392 | 0.059        | 0.166        | 0.218        | 0.892 | 0.794 | 0.794 |
| PCB-SS        | 61.83  | 66.19  | 65.80  | 0.647 | 0.222 | 0.450 | 0.165 | 0.172 | 0.812        | 0.136        | 0.136        | 0.509 | 0.887 | 0.888 |
| PCB 128/158   | 30.96  | 32.73  | 33.47  | 0.969 | 0.225 | 0.818 | 0.250 | 0.251 | 0.887        | 0.118        | 0.118        | 0.918 | 0.614 | 0.614 |
| PCB 126       | 39.11  | 43.58  | 46.34  | 0.972 | 0.099 | 0.839 | 0.182 | 0.183 | 0.991        | 0.054        | 0.054        | 0.854 | 0.387 | 0.387 |
| PCB 180       | 28.29  | 29.12  | 30.00  | 0.291 | 0.441 | 0.421 | 0.601 | 0.605 | 0.140        | 0.257        | 0.295        | 0.468 | 0.391 | 0.406 |

|                |       |       |       |       |       |              |              |              |              |              |              |       |       |       |
|----------------|-------|-------|-------|-------|-------|--------------|--------------|--------------|--------------|--------------|--------------|-------|-------|-------|
| PCB 177        | 27.97 | 30.21 | 29.65 | 0.543 | 0.140 | 0.443        | 0.068        | 0.075        | 0.310        | 0.156        | 0.168        | 0.785 | 0.637 | 0.637 |
| <b>PCB 138</b> | 35.53 | 37.22 | 39.30 | 0.234 | 0.060 | 0.139        | 0.267        | 0.314        | <b>0.280</b> | <b>0.010</b> | <b>0.025</b> | 0.421 | 0.234 | 0.249 |
| PCB 167        | 34.97 | 38.26 | 39.30 | 0.970 | 0.089 | 0.860        | 0.123        | 0.123        | 0.968        | 0.059        | 0.059        | 0.804 | 0.560 | 0.560 |
| <b>PCB 187</b> | 24.20 | 26.61 | 27.09 | 0.121 | 0.042 | <b>0.193</b> | <b>0.009</b> | <b>0.029</b> | <b>0.089</b> | <b>0.048</b> | <b>0.102</b> | 0.269 | 0.691 | 0.699 |
| PCB 156        | 37.82 | 40.89 | 41.86 | 0.877 | 0.120 | 0.699        | 0.130        | 0.135        | 0.620        | 0.069        | 0.075        | 0.937 | 0.626 | 0.626 |
| <b>PCB 168</b> | 35.79 | 38.87 | 40.49 | 0.932 | 0.055 | 0.892        | 0.091        | 0.092        | <b>0.829</b> | <b>0.044</b> | <b>0.046</b> | 0.747 | 0.361 | 0.365 |
| <b>PCB 183</b> | 38.31 | 39.58 | 40.86 | 0.431 | 0.154 | 0.297        | 0.353        | 0.370        | <b>0.685</b> | <b>0.041</b> | <b>0.042</b> | 0.404 | 0.363 | 0.375 |
| PCB 169        | 52.31 | 56.20 | 58.15 | 0.460 | 0.201 | 0.618        | 0.311        | 0.319        | 0.379        | 0.057        | 0.070        | 0.284 | 0.549 | 0.566 |
| PCB 170        | 37.74 | 37.16 | 38.01 | 0.253 | 0.825 | 0.657        | 0.744        | 0.744        | 0.084        | 0.844        | 0.850        | 0.260 | 0.495 | 0.518 |
| PCB 199        | 29.77 | 30.02 | 30.76 | 0.138 | 0.668 | 0.364        | 0.693        | 0.698        | 0.223        | 0.496        | 0.515        | 0.116 | 0.588 | 0.611 |
| <b>PCB 189</b> | 35.28 | 38.09 | 39.85 | 0.926 | 0.025 | 0.747        | 0.078        | 0.082        | <b>0.980</b> | <b>0.024</b> | <b>0.024</b> | 0.710 | 0.198 | 0.201 |
| PCB 194        | 32.64 | 34.58 | 35.58 | 0.342 | 0.107 | 0.717        | 0.061        | 0.068        | 0.356        | 0.096        | 0.120        | 0.238 | 0.478 | 0.501 |

Table S7 ANOVA and IST analysis of recoveries of extracted target chemicals by EA/CH (1:1), DCM/HEX (4:1), and HEX/ACE (1:1) in spiked fish

meat

| Analytes      | Extract solvent (%) |        |        | TOHOV    | ANOVA    | IST (ES1 vs. ES2)    |                      |                      | IST (ES1 vs. ES3)    |                      |                      | IST (ES2 vs. ES3)    |                      |                      |
|---------------|---------------------|--------|--------|----------|----------|----------------------|----------------------|----------------------|----------------------|----------------------|----------------------|----------------------|----------------------|----------------------|
|               | ES1                 | ES2    | ES3    | <i>p</i> | <i>p</i> | <i>p<sub>L</sub></i> | <i>p<sub>e</sub></i> | <i>p<sub>i</sub></i> | <i>p<sub>L</sub></i> | <i>p<sub>e</sub></i> | <i>p<sub>i</sub></i> | <i>p<sub>L</sub></i> | <i>p<sub>e</sub></i> | <i>p<sub>i</sub></i> |
| <b>PAHs</b>   |                     |        |        |          |          |                      |                      |                      |                      |                      |                      |                      |                      |                      |
| Nap           | 95.95               | 108.73 | 96.81  | 0.092    | 0.252    | 0.076                | 0.162                | 0.138                | 0.066                | 0.917                | 0.897                | 0.781                | 0.211                | 0.211                |
| PAH-SS1       | 129.16              | 116.52 | 115.51 | 0.357    | 0.373    | 0.511                | 0.166                | 0.133                | 0.234                | 0.283                | 0.221                | 0.391                | 0.919                | 0.920                |
| Any           | 84.61               | 87.72  | 88.30  | 0.171    | 0.535    | 0.912                | 0.150                | 0.176                | 0.229                | 0.420                | 0.347                | 0.147                | 0.861                | 0.866                |
| <b>Ace</b>    | 107.33              | 111.01 | 106.99 | 0.062    | 0.162    | 0.190                | 0.258                | 0.404                | 0.003                | 0.889                | 0.926                | <b>0.340</b>         | <b>0.036</b>         | <b>0.063</b>         |
| Fle           | 127.97              | 136.04 | 125.88 | 0.177    | 0.723    | 0.187                | 0.663                | 0.605                | 0.621                | 0.824                | 0.816                | 0.177                | 0.504                | 0.519                |
| Phe           | 111.29              | 160.62 | 110.66 | 0.028    | 0.544    | 0.086                | 0.516                | 0.442                | 0.960                | 0.969                | 0.971                | 0.033                | 0.395                | 0.436                |
| Ant           | 111.02              | 114.05 | 109.30 | 0.048    | 0.700    | 0.138                | 0.724                | 0.669                | 0.308                | 0.435                | 0.537                | 0.045                | 0.474                | 0.509                |
| Flu           | 134.82              | 110.63 | 120.64 | 0.039    | 0.573    | 0.174                | 0.446                | 0.378                | 0.049                | 0.221                | 0.407                | 0.033                | 0.654                | 0.675                |
| Pyr           | 65.33               | 59.30  | 75.17  | 0.661    | 0.332    | 0.446                | 0.632                | 0.607                | 0.672                | 0.377                | 0.384                | 0.602                | 0.186                | 0.190                |
| PAH-SS2       | 92.46               | 82.67  | 83.21  | 0.485    | 0.430    | 0.417                | 0.329                | 0.292                | 0.942                | 0.223                | 0.262                | 0.367                | 0.942                | 0.943                |
| Baa           | 85.73               | 85.52  | 85.43  | 0.097    | 0.987    | 0.057                | 0.797                | 0.848                | 0.249                | 0.908                | 0.890                | 0.074                | 0.965                | 0.966                |
| Chr           | 93.79               | 94.13  | 95.96  | 0.125    | 0.779    | 0.757                | 0.867                | 0.859                | 0.149                | 0.635                | 0.570                | 0.124                | 0.614                | 0.628                |
| BbF           | 138.42              | 139.71 | 133.61 | 0.071    | 0.476    | 0.999                | 0.863                | 0.869                | 0.004                | 0.348                | 0.541                | 0.070                | 0.234                | 0.284                |
| BkF           | 133.49              | 131.07 | 126.66 | 0.029    | 0.403    | 0.791                | 0.721                | 0.727                | 0.001                | 0.155                | 0.383                | 0.030                | 0.330                | 0.379                |
| BaP           | 108.88              | 105.42 | 103.61 | 0.017    | 0.028    | 0.046                | 0.119                | 0.281                | 0.010                | 0.038                | 0.194                | 0.378                | 0.087                | 0.095                |
| IcdP          | 92.82               | 93.04  | 91.38  | 0.500    | 0.712    | 0.246                | 0.925                | 0.938                | 0.949                | 0.623                | 0.646                | 0.382                | 0.442                | 0.448                |
| DiahA         | 85.74               | 87.15  | 85.17  | 0.985    | 0.832    | 0.872                | 0.722                | 0.730                | 0.883                | 0.888                | 0.889                | 0.982                | 0.580                | 0.580                |
| BghiP         | 89.46               | 91.50  | 90.35  | 0.465    | 0.846    | 0.398                | 0.517                | 0.484                | 0.326                | 0.830                | 0.802                | 0.522                | 0.753                | 0.755                |
| <b>PAHS</b>   |                     |        |        |          |          |                      |                      |                      |                      |                      |                      |                      |                      |                      |
| <b>OCP-SS</b> | 82.52               | 75.57  | 94.99  | 0.418    | 0.013    | 0.740                | 0.253                | 0.254                | <b>0.366</b>         | <b>0.032</b>         | <b>0.050</b>         | <b>0.170</b>         | <b>0.010</b>         | <b>0.024</b>         |
| $\alpha$ -HCH | 89.12               | 101.59 | 94.27  | 0.053    | 0.151    | 0.063                | 0.122                | 0.182                | 0.245                | 0.089                | 0.111                | 0.117                | 0.330                | 0.365                |
| HCB           | 90.53               | 90.87  | 89.39  | 0.591    | 0.476    | 0.808                | 0.749                | 0.750                | 0.506                | 0.431                | 0.435                | 0.384                | 0.300                | 0.310                |
| $\beta$ -HCH  | 83.05               | 89.00  | 88.88  | 0.038    | 0.440    | 0.056                | 0.371                | 0.418                | 0.089                | 0.389                | 0.427                | 0.214                | 0.940                | 0.941                |



|                 |        |        |        |       |       |              |              |              |       |       |       |              |              |              |
|-----------------|--------|--------|--------|-------|-------|--------------|--------------|--------------|-------|-------|-------|--------------|--------------|--------------|
| γ-HCH           | 89.62  | 93.52  | 93.13  | 0.071 | 0.286 | 0.095        | 0.243        | 0.284        | 0.097 | 0.286 | 0.324 | 0.847        | 0.771        | 0.771        |
| δ-HCH           | 88.55  | 89.76  | 91.57  | 0.114 | 0.836 | 0.146        | 0.847        | 0.852        | 0.115 | 0.628 | 0.645 | 0.887        | 0.542        | 0.543        |
| HC              | 107.47 | 109.01 | 109.37 | 0.920 | 0.663 | 0.795        | 0.496        | 0.496        | 0.891 | 0.445 | 0.445 | 0.713        | 0.873        | 0.873        |
| Ald             | 95.98  | 95.01  | 92.55  | 0.490 | 0.388 | 0.679        | 0.743        | 0.743        | 0.457 | 0.156 | 0.181 | 0.225        | 0.348        | 0.375        |
| ID              | 93.79  | 81.63  | 90.45  | 0.009 | 0.458 | 0.033        | 0.349        | 0.395        | 0.316 | 0.215 | 0.239 | 0.022        | 0.480        | 0.517        |
| cHCP            | 86.44  | 102.03 | 103.43 | 0.107 | 0.344 | 0.251        | 0.123        | 0.150        | 0.062 | 0.246 | 0.291 | 0.269        | 0.925        | 0.926        |
| oCd             | 95.66  | 98.68  | 99.86  | 0.050 | 0.769 | 0.573        | 0.369        | 0.378        | 0.097 | 0.580 | 0.596 | 0.049        | 0.868        | 0.875        |
| tHCP            | 91.69  | 96.98  | 96.41  | 0.261 | 0.467 | 0.361        | 0.194        | 0.204        | 0.162 | 0.363 | 0.386 | 0.404        | 0.916        | 0.917        |
| tCd             | 92.49  | 97.81  | 87.54  | 0.020 | 0.375 | 0.828        | 0.084        | 0.084        | 0.044 | 0.574 | 0.599 | 0.042        | 0.273        | 0.323        |
| o,p'-DDE        | 105.77 | 106.49 | 70.16  | 0.006 | 0.409 | 0.765        | 0.844        | 0.844        | 0.021 | 0.369 | 0.417 | 0.020        | 0.360        | 0.409        |
| ES I            | 101.09 | 103.74 | 100.83 | 0.220 | 0.475 | 0.217        | 0.402        | 0.422        | 0.183 | 0.930 | 0.932 | 0.986        | 0.147        | 0.148        |
| cCd             | 92.99  | 93.69  | 91.64  | 0.196 | 0.722 | 0.459        | 0.827        | 0.829        | 0.107 | 0.631 | 0.650 | 0.217        | 0.311        | 0.344        |
| Dld             | 133.53 | 133.07 | 131.11 | 0.341 | 0.852 | 0.542        | 0.934        | 0.934        | 0.206 | 0.628 | 0.642 | 0.289        | 0.597        | 0.604        |
| p,p'-DDE        | 93.28  | 93.75  | 88.06  | 0.457 | 0.194 | 0.190        | 0.882        | 0.885        | 0.608 | 0.207 | 0.210 | 0.513        | 0.089        | 0.106        |
| o,p'-DDD        | 92.31  | 92.58  | 90.17  | 0.210 | 0.660 | 0.364        | 0.941        | 0.943        | 0.158 | 0.530 | 0.560 | 0.155        | 0.185        | 0.223        |
| Ed              | 127.98 | 126.17 | 125.52 | 0.240 | 0.785 | 0.244        | 0.691        | 0.704        | 0.227 | 0.588 | 0.608 | 0.966        | 0.740        | 0.740        |
| <b>ES II</b>    | 100.07 | 73.63  | 103.12 | 0.010 | 0.000 | <b>0.031</b> | <b>0.005</b> | <b>0.025</b> | 0.026 | 0.541 | 0.571 | <b>0.696</b> | <b>0.000</b> | <b>0.000</b> |
| p,p'-DDD        | 116.16 | 113.01 | 112.38 | 0.814 | 0.693 | 0.662        | 0.558        | 0.563        | 0.632 | 0.486 | 0.492 | 0.916        | 0.877        | 0.877        |
| <b>o,p'-DDT</b> | 151.72 | 155.11 | 142.09 | 0.110 | 0.159 | 0.081        | 0.626        | 0.641        | 0.225 | 0.241 | 0.257 | <b>0.287</b> | <b>0.035</b> | <b>0.044</b> |
| p,p'-DDT        | 158.48 | 159.91 | 155.66 | 0.047 | 0.575 | 0.193        | 0.778        | 0.782        | 0.038 | 0.546 | 0.574 | 0.097        | 0.139        | 0.185        |
| MOC             | 112.73 | 125.82 | 117.81 | 0.232 | 0.959 | 0.424        | 0.824        | 0.827        | 0.136 | 0.922 | 0.926 | 0.268        | 0.796        | 0.804        |
| Mirex           | 102.04 | 102.28 | 104.99 | 0.083 | 0.838 | 0.269        | 0.972        | 0.973        | 0.038 | 0.632 | 0.653 | 0.219        | 0.495        | 0.518        |
| <b>PBDEs</b>    |        |        |        |       |       |              |              |              |       |       |       |              |              |              |
| PBDE 17         | 101.86 | 105.63 | 105.52 | 0.662 | 0.184 | 0.490        | 0.160        | 0.180        | 0.863 | 0.077 | 0.077 | 0.546        | 0.965        | 0.966        |
| PBDE 28         | 99.55  | 102.37 | 102.62 | 0.243 | 0.287 | 0.653        | 0.285        | 0.287        | 0.241 | 0.129 | 0.161 | 0.104        | 0.899        | 0.903        |
| <b>PBDE-SS</b>  | 101.58 | 105.13 | 103.35 | 0.088 | 0.060 | <b>0.053</b> | <b>0.044</b> | <b>0.087</b> | 0.186 | 0.089 | 0.120 | 0.272        | 0.267        | 0.281        |
| PBDE 71         | 97.96  | 98.82  | 99.80  | 0.159 | 0.552 | 0.828        | 0.684        | 0.684        | 0.082 | 0.279 | 0.333 | 0.100        | 0.498        | 0.531        |
| PBDE 47         | 95.39  | 96.92  | 98.44  | 0.581 | 0.321 | 0.562        | 0.498        | 0.504        | 0.396 | 0.193 | 0.217 | 0.621        | 0.349        | 0.352        |
| PBDE 66         | 96.24  | 96.07  | 98.21  | 0.517 | 0.676 | 0.633        | 0.956        | 0.957        | 0.323 | 0.504 | 0.519 | 0.430        | 0.357        | 0.365        |
| PBDE 100        | 96.06  | 95.79  | 98.02  | 0.645 | 0.541 | 0.681        | 0.912        | 0.913        | 0.410 | 0.413 | 0.428 | 0.575        | 0.261        | 0.268        |

|               |        |        |        |       |       |       |       |       |              |              |              |       |       |       |
|---------------|--------|--------|--------|-------|-------|-------|-------|-------|--------------|--------------|--------------|-------|-------|-------|
| PBDE 99       | 95.71  | 94.15  | 97.92  | 0.396 | 0.588 | 0.326 | 0.710 | 0.716 | 0.318        | 0.602        | 0.611        | 0.928 | 0.215 | 0.215 |
| PBDE 85       | 96.68  | 94.31  | 99.77  | 0.235 | 0.524 | 0.147 | 0.660 | 0.669 | 0.224        | 0.580        | 0.588        | 0.975 | 0.176 | 0.178 |
| PBDE 154      | 95.24  | 93.00  | 97.14  | 0.517 | 0.524 | 0.218 | 0.554 | 0.562 | 0.526        | 0.650        | 0.651        | 0.718 | 0.234 | 0.241 |
| PBDE 153      | 93.01  | 90.31  | 95.50  | 0.249 | 0.587 | 0.119 | 0.615 | 0.629 | 0.415        | 0.679        | 0.682        | 0.401 | 0.228 | 0.247 |
| PBDE 138      | 85.94  | 81.96  | 87.16  | 0.094 | 0.597 | 0.050 | 0.467 | 0.504 | 0.602        | 0.854        | 0.855        | 0.077 | 0.254 | 0.309 |
| PBDE 183      | 85.35  | 81.01  | 84.10  | 0.131 | 0.722 | 0.089 | 0.456 | 0.496 | 0.700        | 0.859        | 0.860        | 0.056 | 0.481 | 0.518 |
| PBDE 190      | 78.74  | 72.05  | 75.84  | 0.257 | 0.586 | 0.157 | 0.354 | 0.391 | 0.530        | 0.714        | 0.717        | 0.204 | 0.447 | 0.467 |
| PBDE 209      | 70.49  | 60.55  | 72.69  | 0.096 | 0.673 | 0.034 | 0.473 | 0.507 | 0.821        | 0.904        | 0.904        | 0.092 | 0.369 | 0.411 |
| <b>PCBs</b>   |        |        |        |       |       |       |       |       |              |              |              |       |       |       |
| PCB 18        | 76.08  | 77.65  | 78.34  | 0.415 | 0.728 | 0.510 | 0.651 | 0.654 | 0.462        | 0.368        | 0.373        | 0.260 | 0.827 | 0.831 |
| PCB 44        | 75.17  | 76.49  | 78.22  | 0.290 | 0.654 | 0.277 | 0.735 | 0.741 | 0.832        | 0.230        | 0.232        | 0.217 | 0.654 | 0.665 |
| PCB 49        | 74.87  | 74.81  | 74.86  | 0.533 | 1.000 | 0.343 | 0.986 | 0.987 | 0.712        | 0.998        | 0.998        | 0.472 | 0.988 | 0.988 |
| PCB 52        | 90.23  | 90.29  | 89.82  | 0.088 | 0.986 | 0.143 | 0.988 | 0.989 | 0.351        | 0.729        | 0.732        | 0.107 | 0.903 | 0.908 |
| PCB 37        | 92.36  | 97.03  | 98.14  | 0.102 | 0.390 | 0.081 | 0.360 | 0.408 | 0.070        | 0.067        | 0.119        | 0.313 | 0.837 | 0.840 |
| PCB 70        | 90.70  | 96.91  | 97.56  | 0.364 | 0.207 | 0.233 | 0.191 | 0.236 | 0.292        | 0.056        | 0.075        | 0.520 | 0.889 | 0.890 |
| <b>PCB 74</b> | 87.70  | 93.80  | 95.26  | 0.214 | 0.136 | 0.167 | 0.181 | 0.238 | <b>0.119</b> | <b>0.015</b> | <b>0.031</b> | 0.362 | 0.738 | 0.745 |
| PCB 87        | 92.30  | 94.85  | 94.16  | 0.055 | 0.763 | 0.078 | 0.568 | 0.590 | 0.801        | 0.339        | 0.339        | 0.088 | 0.876 | 0.881 |
| PCB 99        | 89.86  | 92.15  | 93.73  | 0.249 | 0.387 | 0.249 | 0.491 | 0.512 | 0.915        | 0.059        | 0.060        | 0.226 | 0.626 | 0.642 |
| PCB 114       | 86.91  | 91.92  | 91.55  | 0.504 | 0.357 | 0.340 | 0.241 | 0.273 | 0.218        | 0.169        | 0.187        | 0.735 | 0.933 | 0.933 |
| PCB 101       | 95.16  | 99.31  | 98.26  | 0.558 | 0.676 | 0.692 | 0.471 | 0.473 | 0.340        | 0.547        | 0.554        | 0.482 | 0.814 | 0.815 |
| PCB 81        | 100.32 | 106.29 | 106.52 | 0.382 | 0.585 | 0.255 | 0.444 | 0.458 | 0.942        | 0.277        | 0.278        | 0.323 | 0.977 | 0.977 |
| PCB 77        | 92.85  | 99.82  | 102.51 | 0.729 | 0.179 | 0.504 | 0.222 | 0.235 | 0.814        | 0.070        | 0.071        | 0.631 | 0.621 | 0.624 |
| PCB 151       | 90.81  | 94.08  | 93.61  | 0.397 | 0.483 | 0.330 | 0.270 | 0.304 | 0.098        | 0.305        | 0.335        | 0.915 | 0.893 | 0.893 |
| PCB 119       | 85.19  | 89.53  | 92.38  | 0.571 | 0.215 | 0.354 | 0.290 | 0.308 | 0.373        | 0.084        | 0.095        | 0.800 | 0.523 | 0.524 |
| PCB 105       | 87.73  | 93.51  | 94.21  | 0.569 | 0.168 | 0.410 | 0.135 | 0.157 | 0.242        | 0.085        | 0.100        | 0.978 | 0.858 | 0.858 |
| PCB 123       | 90.11  | 95.12  | 97.27  | 0.480 | 0.367 | 0.335 | 0.328 | 0.347 | 0.215        | 0.168        | 0.187        | 0.983 | 0.713 | 0.713 |
| PCB 153/157   | 92.69  | 96.87  | 96.12  | 0.583 | 0.624 | 0.718 | 0.340 | 0.344 | 0.293        | 0.482        | 0.490        | 0.560 | 0.885 | 0.885 |
| PCB 118       | 98.79  | 103.51 | 105.09 | 0.231 | 0.427 | 0.177 | 0.349 | 0.392 | 0.059        | 0.166        | 0.218        | 0.892 | 0.794 | 0.794 |
| PCB-SS        | 92.16  | 98.67  | 98.08  | 0.647 | 0.222 | 0.450 | 0.165 | 0.172 | 0.812        | 0.136        | 0.136        | 0.509 | 0.887 | 0.888 |
| PCB 128/158   | 91.23  | 96.51  | 98.42  | 0.969 | 0.236 | 0.818 | 0.245 | 0.247 | 0.887        | 0.126        | 0.126        | 0.918 | 0.658 | 0.659 |

|                |        |        |        |       |       |       |       |       |              |              |              |       |       |       |
|----------------|--------|--------|--------|-------|-------|-------|-------|-------|--------------|--------------|--------------|-------|-------|-------|
| PCB 126        | 86.35  | 96.22  | 102.31 | 0.972 | 0.099 | 0.839 | 0.182 | 0.183 | 0.991        | 0.054        | 0.054        | 0.854 | 0.387 | 0.387 |
| PCB 180        | 94.42  | 97.19  | 100.12 | 0.291 | 0.441 | 0.421 | 0.601 | 0.605 | 0.140        | 0.257        | 0.295        | 0.468 | 0.391 | 0.406 |
| PCB 177        | 91.34  | 98.64  | 96.82  | 0.543 | 0.140 | 0.443 | 0.068 | 0.075 | 0.310        | 0.156        | 0.168        | 0.785 | 0.637 | 0.637 |
| <b>PCB 138</b> | 93.22  | 97.66  | 103.11 | 0.234 | 0.060 | 0.139 | 0.267 | 0.314 | <b>0.280</b> | <b>0.010</b> | <b>0.025</b> | 0.421 | 0.234 | 0.249 |
| PCB 167        | 88.78  | 97.13  | 99.76  | 0.970 | 0.089 | 0.860 | 0.123 | 0.123 | 0.968        | 0.059        | 0.059        | 0.804 | 0.560 | 0.560 |
| PCB 187        | 89.52  | 98.43  | 100.21 | 0.121 | 0.042 | 0.193 | 0.009 | 0.029 | 0.089        | 0.048        | 0.102        | 0.269 | 0.691 | 0.699 |
| PCB 156        | 91.51  | 98.94  | 101.28 | 0.877 | 0.120 | 0.699 | 0.130 | 0.135 | 0.620        | 0.069        | 0.075        | 0.937 | 0.626 | 0.626 |
| <b>PCB 168</b> | 90.73  | 98.53  | 102.63 | 0.932 | 0.055 | 0.892 | 0.091 | 0.092 | <b>0.829</b> | <b>0.044</b> | <b>0.046</b> | 0.747 | 0.361 | 0.365 |
| <b>PCB 183</b> | 100.23 | 103.54 | 106.89 | 0.431 | 0.154 | 0.297 | 0.353 | 0.370 | <b>0.685</b> | <b>0.041</b> | <b>0.042</b> | 0.404 | 0.363 | 0.375 |
| PCB 169        | 116.61 | 125.27 | 129.63 | 0.460 | 0.201 | 0.618 | 0.311 | 0.319 | 0.379        | 0.057        | 0.070        | 0.284 | 0.549 | 0.566 |
| PCB 170        | 124.08 | 122.19 | 124.98 | 0.253 | 0.825 | 0.657 | 0.744 | 0.744 | 0.084        | 0.844        | 0.850        | 0.260 | 0.495 | 0.518 |
| PCB 199        | 104.15 | 105.04 | 107.63 | 0.138 | 0.668 | 0.364 | 0.693 | 0.698 | 0.223        | 0.496        | 0.515        | 0.116 | 0.588 | 0.611 |
| <b>PCB 189</b> | 104.72 | 113.08 | 118.30 | 0.926 | 0.025 | 0.747 | 0.078 | 0.082 | <b>0.980</b> | <b>0.024</b> | <b>0.024</b> | 0.710 | 0.198 | 0.201 |
| PCB 194        | 104.69 | 110.90 | 114.12 | 0.342 | 0.107 | 0.717 | 0.061 | 0.068 | 0.356        | 0.096        | 0.120        | 0.238 | 0.478 | 0.501 |

Table S17 Recoveries (RV), relative standard deviation (RSD), quality judgment (QJ) of target chemicals in spiked fish meat extracted by EA/CH (1:1), DCM/HEX (4:1), and HEX/ACE(1:1)

| Analytes      | EA/CH (1:1) |        |    | DCM/HEX (4:1) |        |    | HEX/ACE(1:1) |        |    |
|---------------|-------------|--------|----|---------------|--------|----|--------------|--------|----|
|               | RV, %       | RSD, % | QJ | RV, %         | RSD, % | QJ | RV, %        | RSD, % | QJ |
| <b>PAHs</b>   |             |        |    |               |        |    |              |        |    |
| Nap           | 95.9        | 0.8    | G  | 110.1         | 8.4    | G  | 96.7         | 10.6   | G  |
| PAH-SS1       | 125.1       | 4.3    | G  | 123.3         | 3.0    | G  | 119.4        | 9.2    | G  |
| Any           | 84.6        | 2.1    | G  | 87.1          | 2.0    | G  | 88.5         | 5.8    | G  |
| Ace           | 107.3       | 3.8    | G  | 111.2         | 1.9    | G  | 107.4        | 0.8    | G  |
| Fle           | 128.0       | 6.3    | G  | 136.3         | 16.0   | B  | 128.0        | 7.9    | G  |
| Phe           | 111.3       | 15.2   | G  | 166.7         | 53.6   | B  | 127.5        | 12.6   | G  |
| Ant           | 111.0       | 2.5    | G  | 114.9         | 9.0    | G  | 110.4        | 1.5    | G  |
| Flu           | 134.8       | 11.5   | B  | 124.1         | 28.6   | G  | 128.5        | 4.4    | G  |
| Pyr           | 65.3        | 15.1   | B  | 71.3          | 19.0   | G  | 79.9         | 13.4   | G  |
| PAH-SS2       | 121.0       | 23.1   | G  | 109.4         | 17.7   | G  | 102.1        | 17.3   | G  |
| Baa           | 85.7        | 1.4    | G  | 86.1          | 0.6    | G  | 85.7         | 3.6    | G  |
| Chr           | 93.8        | 1.8    | G  | 95.7          | 2.2    | G  | 96.5         | 5.6    | G  |
| BbF           | 138.4       | 5.6    | B  | 140.0         | 5.2    | B  | 133.7        | 1.4    | B  |
| BkF           | 133.5       | 5.0    | B  | 131.6         | 5.2    | B  | 126.7        | 0.8    | G  |
| BaP           | 108.9       | 2.4    | G  | 108.4         | 1.1    | G  | 104.3        | 0.8    | G  |
| IcdP          | 92.8        | 3.3    | G  | 93.1          | 2.1    | G  | 91.5         | 3.1    | G  |
| DiahA         | 85.7        | 4.6    | G  | 87.2          | 4.5    | G  | 85.2         | 4.9    | G  |
| BghiP         | 89.5        | 2.6    | G  | 91.6          | 3.7    | G  | 90.4         | 5.4    | G  |
| <b>OCPs</b>   |             |        |    |               |        |    |              |        |    |
| OCP-SS        | 88.4        | 9.4    | G  | 81.6          | 9.5    | G  | 94.2         | 10.3   | G  |
| $\alpha$ -HCH | 89.1        | 2.1    | G  | 101.6         | 10.7   | G  | 94.3         | 3.8    | G  |
| HCB           | 90.5        | 1.5    | G  | 90.9          | 1.3    | G  | 89.4         | 2.0    | G  |
| $\beta$ -HCH  | 83.0        | 12.3   | G  | 89.0          | 1.2    | G  | 88.9         | 2.7    | G  |
| $\gamma$ -HCH | 89.6        | 5.2    | G  | 93.5          | 1.6    | G  | 93.1         | 1.7    | G  |
| $\delta$ -HCH | 88.5        | 10.8   | G  | 89.8          | 4.0    | G  | 91.6         | 3.3    | G  |
| HC            | 107.5       | 2.5    | G  | 109.0         | 2.2    | G  | 109.4        | 2.6    | G  |
| Ald           | 96.0        | 3.2    | G  | 95.0          | 3.9    | G  | 92.5         | 1.7    | G  |
| ID            | 93.8        | 3.7    | G  | 81.6          | 24.0   | G  | 90.4         | 2.0    | G  |
| cHCP          | 86.4        | 6.9    | G  | 102.0         | 12.2   | G  | 103.4        | 20.1   | G  |
| oCd           | 95.7        | 4.5    | G  | 98.7          | 2.8    | G  | 99.9         | 11.3   | G  |
| tHCP          | 91.7        | 3.6    | G  | 97.0          | 5.0    | G  | 96.4         | 7.5    | G  |
| tCd           | 92.5        | 3.2    | G  | 97.8          | 2.8    | G  | 87.5         | 15.7   | G  |
| o,p'-DDE      | 105.8       | 4.5    | G  | 106.5         | 3.4    | G  | 105.2        | 2.9    | G  |
| ES I          | 101.1       | 4.4    | G  | 103.7         | 2.0    | G  | 100.8        | 1.9    | G  |
| cCd           | 93.0        | 4.7    | G  | 93.7          | 3.1    | G  | 91.6         | 1.2    | G  |
| Dld           | 133.5       | 5.6    | B  | 133.1         | 3.9    | B  | 131.1        | 2.2    | B  |
| p,p'-DDE      | 93.3        | 5.0    | G  | 93.8          | 2.4    | G  | 88.1         | 4.3    | G  |
| o,p'-DDD      | 92.3        | 5.8    | G  | 92.6          | 2.6    | G  | 90.2         | 1.0    | G  |

|              |       |      |   |       |      |   |       |      |   |
|--------------|-------|------|---|-------|------|---|-------|------|---|
| Ed           | 128.0 | 5.4  | G | 126.2 | 1.9  | G | 125.5 | 1.7  | G |
| ES II        | 100.1 | 7.8  | G | 73.6  | 1.8  | G | 103.1 | 1.0  | G |
| p,p'-DDD     | 116.2 | 6.2  | G | 113.0 | 4.1  | G | 112.4 | 4.1  | G |
| o,p'-DDT     | 151.7 | 6.9  | B | 155.1 | 2.5  | B | 142.1 | 4.3  | B |
| p,p'-DDT     | 158.5 | 4.6  | B | 159.9 | 2.4  | B | 155.7 | 0.8  | B |
| MOC          | 612.7 | 13.5 | B | 625.8 | 7.6  | B | 617.8 | 2.5  | B |
| Mirex        | 102.0 | 9.5  | G | 102.3 | 5.8  | G | 105.0 | 2.0  | G |
| <b>PBDEs</b> |       |      |   |       |      |   |       |      |   |
| PBDE 17      | 101.9 | 1.8  | G | 105.6 | 3.1  | G | 105.5 | 1.9  | G |
| PBDE 28      | 99.5  | 2.6  | G | 102.4 | 3.0  | G | 102.6 | 1.1  | G |
| PBDE-SS      | 102.1 | 1.6  | G | 101.6 | 3.6  | G | 100.8 | 2.6  | G |
| PBDE 71      | 98.0  | 2.6  | G | 98.8  | 2.3  | G | 99.8  | 0.4  | G |
| PBDE 47      | 95.4  | 3.2  | G | 96.9  | 2.0  | G | 98.4  | 1.6  | G |
| PBDE 66      | 96.2  | 4.4  | G | 96.1  | 3.1  | G | 98.2  | 2.0  | G |
| PBDE 100     | 96.1  | 3.4  | G | 95.8  | 2.5  | G | 98.0  | 1.8  | G |
| PBDE 99      | 95.7  | 6.3  | G | 94.1  | 3.3  | G | 97.9  | 3.2  | G |
| PBDE 85      | 96.7  | 8.0  | G | 94.3  | 4.0  | G | 99.8  | 4.4  | G |
| PBDE 154     | 95.2  | 5.5  | G | 93.0  | 3.2  | G | 97.1  | 4.3  | G |
| PBDE 153     | 93.0  | 8.6  | G | 90.3  | 3.4  | G | 95.5  | 5.8  | G |
| PBDE 138     | 85.9  | 9.9  | G | 82.0  | 1.4  | G | 87.2  | 7.7  | G |
| PBDE 183     | 85.3  | 10.7 | G | 81.0  | 0.6  | G | 84.1  | 8.2  | G |
| PBDE 190     | 78.7  | 13.5 | G | 72.1  | 4.4  | G | 75.8  | 9.4  | G |
| PBDE 209     | 70.5  | 30.3 | B | 60.6  | 6.7  | B | 72.7  | 28.0 | G |
| <b>PCBs</b>  |       |      |   |       |      |   |       |      |   |
| PCB 18       | 76.1  | 4.1  | G | 77.7  | 5.9  | G | 78.3  | 2.9  | G |
| PCB 44       | 75.2  | 3.8  | G | 76.5  | 7.4  | G | 78.2  | 3.1  | G |
| PCB 49       | 74.9  | 3.6  | G | 74.8  | 5.8  | G | 74.9  | 4.1  | G |
| PCB 52       | 90.2  | 1.8  | G | 90.3  | 6.9  | G | 89.8  | 1.2  | G |
| PCB 37       | 92.4  | 0.9  | G | 97.0  | 8.0  | G | 98.1  | 4.0  | G |
| PCB 70       | 90.7  | 2.3  | G | 96.9  | 6.7  | G | 97.6  | 4.0  | G |
| PCB 74       | 87.7  | 1.5  | G | 93.8  | 6.8  | G | 95.3  | 3.1  | G |
| PCB 87       | 92.3  | 2.2  | G | 94.8  | 7.2  | G | 94.2  | 2.3  | G |
| PCB 99       | 89.9  | 2.1  | G | 92.2  | 5.3  | G | 93.7  | 1.8  | G |
| PCB 114      | 86.9  | 2.8  | G | 91.9  | 6.4  | G | 91.6  | 4.5  | G |
| PCB 101      | 95.2  | 7.3  | G | 99.3  | 5.8  | G | 98.3  | 4.4  | G |
| PCB 81       | 100.3 | 5.6  | G | 106.3 | 10.2 | G | 106.5 | 6.0  | G |
| PCB 77       | 92.8  | 4.8  | G | 99.8  | 7.1  | G | 102.5 | 5.0  | G |
| PCB 151      | 90.8  | 1.7  | G | 94.1  | 4.4  | G | 93.6  | 4.1  | G |
| PCB 119      | 85.2  | 3.5  | G | 89.5  | 6.0  | G | 92.4  | 4.9  | G |
| PCB 105      | 87.7  | 2.8  | G | 93.5  | 5.1  | G | 94.2  | 4.5  | G |
| PCB 123      | 90.1  | 4.0  | G | 95.1  | 7.3  | G | 97.3  | 6.6  | G |
| PCB 153/157  | 92.7  | 4.3  | G | 96.9  | 5.5  | G | 96.1  | 6.8  | G |
| PCB 118      | 98.8  | 1.6  | G | 103.5 | 7.3  | G | 105.1 | 5.9  | G |
| PCB-SS       | 79.6  | 4.8  | G | 93.2  | 5.8  | G | 97.2  | 4.1  | G |
| PCB 128/158  | 91.2  | 4.8  | G | 96.5  | 5.3  | G | 98.4  | 4.8  | G |
| PCB 126      | 86.3  | 8.1  | G | 96.2  | 8.3  | G | 102.3 | 7.3  | G |

|         |       |     |   |       |     |   |       |     |   |
|---------|-------|-----|---|-------|-----|---|-------|-----|---|
| PCB 180 | 94.4  | 7.5 | G | 97.2  | 4.8 | G | 100.1 | 2.5 | G |
| PCB 177 | 91.3  | 3.2 | G | 98.6  | 4.2 | G | 96.8  | 4.7 | G |
| PCB 138 | 93.2  | 1.6 | G | 97.7  | 5.9 | G | 103.1 | 3.3 | G |
| PCB 167 | 88.8  | 6.0 | G | 97.1  | 5.3 | G | 99.8  | 5.0 | G |
| PCB 187 | 89.5  | 1.1 | G | 98.4  | 3.1 | G | 100.2 | 6.5 | G |
| PCB 156 | 91.5  | 4.5 | G | 98.9  | 5.4 | G | 101.3 | 5.5 | G |
| PCB 168 | 90.7  | 4.9 | G | 98.5  | 4.2 | G | 102.6 | 5.4 | G |
| PCB 183 | 100.2 | 2.5 | G | 103.5 | 4.7 | G | 106.9 | 2.7 | G |
| PCB 169 | 116.6 | 6.3 | G | 125.3 | 8.5 | G | 129.6 | 3.3 | G |
| PCB 170 | 124.1 | 5.7 | G | 122.2 | 5.0 | G | 125.0 | 1.7 | G |
| PCB 199 | 104.2 | 3.0 | G | 105.0 | 1.7 | G | 107.6 | 6.9 | G |
| PCB 189 | 104.7 | 4.6 | G | 113.1 | 3.3 | G | 118.3 | 3.8 | G |
| PCB 194 | 104.7 | 3.2 | G | 110.9 | 2.2 | G | 114.1 | 5.9 | G |

Note: G – good, B – bad

Table S9 GC/MS or GC/MS/MS abundance of target chemicals at every fraction of GPC from the

10<sup>th</sup> min

| Fraction No.   | 1     | 2     | 3     | 4     | 5     | 6     | 7     | 8     | 9     | 10    |
|----------------|-------|-------|-------|-------|-------|-------|-------|-------|-------|-------|
| Time, min      | 10~13 | 13~16 | 16~19 | 19~22 | 22~25 | 25~28 | 28~31 | 31~34 | 34~37 | 37~40 |
| <b>PAHs</b>    |       |       |       |       |       |       |       |       |       |       |
| PAH-IS1        |       | 4622  | 11077 |       |       |       |       |       |       |       |
| Nap            | 638   | 3122  | 7954  | 515   | 584   | 435   |       |       | 513   |       |
| PAH-IS2        | 2323  | 517   | 8742  | 85    |       |       |       |       |       |       |
| <b>PAH-SS1</b> |       |       |       |       |       |       |       |       |       |       |
| Any            |       | 664   | 12254 |       |       |       |       |       |       |       |
| Ace            |       | 425   | 6444  | 179   | 107   | 70    | 84    |       | 103   |       |
| Fle            | 172   | 899   | 8499  | 194   | 134   | 154   | 133   | 105   | 196   |       |
| PAH-IS3        |       | 141   | 5785  | 883   |       |       |       |       |       |       |
| Phe            | 542   | 690   | 9943  | 2660  | 476   | 510   | 443   | 328   | 712   | 337   |
| Ant            | 82    | 213   | 8183  | 1728  | 41    | 30    | 26    | 21    | 66    | 15    |
| Flu            | 579   | 157   | 2813  | 7150  | 127   | 110   |       |       | 105   |       |
| PAH-IS4        |       |       | 282   | 3602  | 241   |       |       |       |       |       |
| Pyr            | 801   | 275   | 1157  | 9014  | 760   | 206   | 263   | 142   | 259   | 189   |
| <b>PAH-SS2</b> |       |       |       |       |       |       |       |       |       |       |
| Ret            |       | 808   | 776   |       |       |       |       |       |       |       |
| BcP            |       |       | 744   | 3894  | 78    |       |       |       |       |       |
| CcdP           |       |       | 54    | 879   | 2429  |       |       |       |       |       |
| BaA            | 174   |       | 343   | 3231  | 113   |       |       |       |       |       |
| Chr            | 122   |       | 252   | 3740  | 427   |       |       |       |       |       |
| PAH-IS5        |       |       |       | 50    | 546   | 498   |       |       |       |       |
| BbF            |       |       |       | 896   | 1385  |       |       |       |       |       |
| BkF            |       |       |       | 1071  | 981   |       |       |       |       |       |
| BeP            |       |       |       | 112   | 1659  | 650   |       |       |       |       |
| BaP            |       |       |       | 108   | 1365  | 120   |       |       |       |       |
| Per            |       |       |       |       | 505   | 674   |       |       |       |       |
| IcdP           |       |       |       |       | 580   | 379   |       |       |       |       |
| DahA           |       |       |       | 329   | 788   |       |       |       |       |       |
| BghiP          |       |       |       |       | 86    | 403   | 609   |       |       |       |
| Antt           |       |       |       |       | 63    | 343   | 395   |       |       |       |
| DiBaIP         |       |       |       |       | 63    | 280   | 361   |       |       |       |
| DiBaeF         |       |       |       |       | 213   | 396   | 91    |       |       |       |
| Cor            |       |       |       |       |       | 75    | 425   | 313   |       |       |
| DiBaeP         |       |       |       |       |       | 218   | 470   |       |       |       |
| DiBaiP         |       |       |       |       |       | 146   | 244   |       |       |       |
| DiBahP         |       |       |       |       |       | 140   | 346   |       |       |       |
| <b>OCPs</b>    |       |       |       |       |       |       |       |       |       |       |
| OCP-IS         | 15    | 191   | 3530  | 872   |       |       |       |       |       |       |
| OCP-SS         |       | 45    | 1040  | 103   |       |       |       |       |       |       |

|               |      |       |       |      |      |          |
|---------------|------|-------|-------|------|------|----------|
| $\alpha$ -HCH | 310  | 3110  | 83    |      |      |          |
| HCB           | 70   | 601   | 13997 | 8317 | 37   |          |
| $\beta$ -HCH  | 869  | 131   |       |      |      |          |
| $\gamma$ -HCH | 172  | 2256  | 118   |      |      |          |
| $\delta$ -HCH | 2184 | 525   |       |      |      |          |
| HC            | 33   | 458   | 33    |      |      |          |
| Ald           | 10   | 352   | 135   |      |      |          |
| ID            | 114  | 3987  | 3109  |      |      |          |
| cHCP          |      | 43    |       |      |      |          |
| oCd           | 30   | 66    |       |      |      |          |
| tHCP          |      | 79    |       |      |      |          |
| tCd           | 645  | 851   |       |      |      |          |
| o,p'-DDE      |      | 132   | 48    |      |      |          |
| ES I          | 45   | 795   | 138   |      |      |          |
| cCd           | 132  | 433   | 51    |      |      |          |
| Dld           | 48   | 1682  | 2003  | 22   |      |          |
| p,p'-DDE      | 143  | 4065  | 1745  | 12   |      |          |
| o,p'-DDD      | 307  | 1325  | 67    |      |      |          |
| Ed            | 54   | 896   | 3198  | 90   |      |          |
| ES II         | 131  | 1042  | 62    |      |      |          |
| p,p'-DDD      | 852  | 1634  | 34    |      |      |          |
| o,p'-DDT      | 852  | 1730  | 622   |      |      |          |
| p,p'-DDT      | 124  | 1471  | 119   |      |      |          |
| MOC           | 6    | 335   | 532   | 6    | 19   |          |
| Mirex         | 8    | 350   | 348   |      |      |          |
| <b>PBDEs</b>  |      |       |       |      |      |          |
| PBDE-IS       | 1219 | 33691 | 14939 | 181  | 17   |          |
| PBDE 17       |      | 127   | 1702  | 627  |      |          |
| PBDE 28       |      | 129   | 1514  | 483  |      |          |
| PBDE-SS       | 54   | 1894  | 2198  | 36   |      |          |
| PBDE 71       |      | 169   | 1573  | 458  |      |          |
| PBDE 47       |      | 109   | 1301  | 584  |      |          |
| PBDE 66       |      | 71    | 1104  | 547  |      |          |
| PBDE 100      |      | 144   | 1581  | 741  |      |          |
| PBDE 99       |      | 129   | 1444  | 575  |      |          |
| PBDE 85       |      |       | 543   | 1180 |      |          |
| PBDE 154      |      | 258   | 1745  | 394  |      |          |
| PBDE 153      |      | 259   | 1560  | 283  |      |          |
| PBDE 138      |      | 37    | 596   | 1018 | 30   |          |
| PBDE 183      |      | 280   | 1226  | 467  |      |          |
| PBDE 190      |      | 21    | 328   | 1095 | 150  |          |
| PBDE 209      |      |       | 21    | 484  | 3475 | 2155 197 |
| <b>PCBs</b>   |      |       |       |      |      |          |
| PCB 18        | 218  | 4230  | 7760  | 79   |      |          |
| PCB 44        | 42   | 817   | 727   |      |      |          |
| PCB 49        | 44   | 847   | 551   |      |      |          |



---

|             |     |      |      |     |
|-------------|-----|------|------|-----|
| PCB 52      | 18  | 631  | 967  |     |
| PCB 37      |     | 95   | 1482 | 25  |
| PCB 70      |     | 527  | 1724 | 44  |
| PCB 74      |     | 711  | 1737 | 58  |
| PCB 99      | 68  | 1262 | 1040 |     |
| PCB 87      | 71  | 1725 | 1009 |     |
| PCB 114     | 109 | 2159 | 1106 |     |
| PCB 101     | 62  | 1952 | 2336 |     |
| PCB 81      |     | 86   | 775  | 94  |
| PCB 77      |     | 167  | 1462 |     |
| PCB 151     | 103 | 1792 | 501  |     |
| PCB 119     |     | .    | 1295 |     |
| PCB 105     | 38  | 620  | 1513 | 30  |
| PCB 123     |     | 405  | 1666 | 110 |
| PCB 153/157 | 86  | 1482 | 823  |     |
| PCB 118     |     | 237  | 718  | 43  |
| PCB-SS      |     | 437  | 457  |     |
| PCB 128/158 | 118 | 2373 | 2103 | 32  |
| PCB 126     |     | 127  | 544  |     |
| PCB 180     | 47  | 682  | 197  |     |
| PCB 177     |     | 632  | 217  |     |
| PCB 138     |     | 282  | 436  |     |
| PCB 167     |     | 326  | 583  |     |
| PCB 187     | 66  | 996  | 488  |     |
| PCB 156     |     | 206  | 678  | 53  |
| PCB 168     |     | 174  | 576  | 58  |
| PCB 183     |     | 630  | 648  |     |
| PCB 169     |     | 114  | 118  |     |
| PCB 170     |     | 166  | 226  |     |
| PCB 199     | 35  | 459  | 156  |     |
| PCB 189     |     | 533  | 1414 | 56  |
| PCB-IS      |     | 971  | 441  |     |
| PCB 194     | 35  | 629  | 739  | 37  |

---

Table S10 ANOVA and IST analysis of recoveries of PAHs in spiked fish meat cleaned up by SPE cartridge (SC) and chromatography column (CC)

| Analytes      | SC,<br>% | CC,<br>% | TOHOV    | ANOVA    | IST (CS vs. CC)      |                      |                      | ANOVA | IST | QJ |
|---------------|----------|----------|----------|----------|----------------------|----------------------|----------------------|-------|-----|----|
|               |          |          | <i>p</i> | <i>p</i> | <i>p<sub>L</sub></i> | <i>p<sub>e</sub></i> | <i>p<sub>i</sub></i> |       |     |    |
| <b>PAHs</b>   |          |          |          |          |                      |                      |                      |       |     |    |
| Nap           | 108.1    | 97.1     | 0.102    | 0.201    | 0.102                | 0.201                | 0.235                | U     | U   | U  |
| PAH-SS1       | 89.1     | 87.5     | 0.112    | 0.802    | 0.112                | 0.802                | 0.813                | U     | U   | U  |
| Any           | 88.1     | 105.4    | 0.053    | 0.299    | 0.053                | 0.299                | 0.355                | U     | U   | U  |
| Ace           | 93.5     | 92.0     | 0.034    | 0.703    | 0.034                | 0.703                | 0.719                | 0     | U   | U  |
| Fle           | 140.3    | 100.5    | 0.130    | 0.001    | 0.130                | 0.001                | 0.016                | S     | S   | CC |
| Phe           | 152.4    | 107.2    | 0.060    | 0.071    | 0.060                | 0.071                | 0.119                | U     | U   | U  |
| Ant           | 103.4    | 94.1     | 0.434    | 0.015    | 0.434                | 0.015                | 0.019                | S     | S   | SC |
| Flu           | 138.6    | 115.1    | 0.374    | 0.255    | 0.374                | 0.255                | 0.284                | U     | U   | U  |
| Pyr           | 95.2     | 118.5    | 0.023    | 0.170    | 0.023                | 0.170                | 0.235                | 0     | U   | U  |
| PAH-SS2       | 84.7     | 99.0     | 0.147    | 0.016    | 0.147                | 0.016                | 0.053                | S     | S   | CC |
| Ret           | 83.8     | 111.0    | 0.350    | 0.002    | 0.350                | 0.002                | 0.003                | S     | S   | CC |
| BcP           | 91.7     | 108.1    | 0.104    | 0.001    | 0.104                | 0.001                | 0.006                | S     | S   | CC |
| CcdP          | 87.1     | 124.9    | 0.239    | 0.000    | 0.239                | 0.000                | 0.004                | S     | S   | SC |
| BaA           | 97.7     | 98.1     | 0.989    | 0.755    | 0.989                | 0.755                | 0.755                | U     | U   | U  |
| Chr           | 95.3     | 100.6    | 0.672    | 0.011    | 0.672                | 0.011                | 0.012                | S     | S   | CC |
| BbF           | 98.6     | 99.3     | 0.165    | 0.822    | 0.165                | 0.822                | 0.826                | U     | U   | U  |
| BkF           | 108.8    | 94.3     | 0.055    | 0.003    | 0.055                | 0.003                | 0.019                | S     | S   | CC |
| BeP           | 103.4    | 102.9    | 0.090    | 0.856    | 0.090                | 0.856                | 0.861                | U     | U   | U  |
| BaP           | 96.2     | 95.5     | 0.072    | 0.741    | 0.072                | 0.741                | 0.753                | U     | U   | U  |
| Per           | 92.6     | 92.9     | 0.197    | 0.870    | 0.197                | 0.870                | 0.873                | U     | U   | U  |
| IcdP          | 110.9    | 84.9     | 0.396    | 0.001    | 0.396                | 0.001                | 0.002                | S     | S   | SC |
| DahA          | 109.4    | 82.6     | 0.061    | 0.004    | 0.061                | 0.004                | 0.024                | S     | S   | SC |
| BghiP         | 115.4    | 92.2     | 0.061    | 0.012    | 0.061                | 0.012                | 0.035                | S     | S   | CC |
| Antt          | 98.3     | 73.0     | 0.061    | 0.012    | 0.061                | 0.012                | 0.038                | S     | S   | SC |
| DiBaIP        | 79.1     | 88.8     | 0.050    | 0.349    | 0.050                | 0.349                | 0.388                | U     | U   | U  |
| DiBaeF        | 82.3     | 79.1     | 0.028    | 0.793    | 0.028                | 0.793                | 0.805                | 0     | U   | U  |
| Cor           | 93.9     | 83.8     | 0.019    | 0.465    | 0.019                | 0.465                | 0.504                | 0     | U   | U  |
| DiBaeP        | 86.4     | 80.9     | 0.024    | 0.667    | 0.024                | 0.667                | 0.687                | 0     | U   | U  |
| DiBaiP        | 68.7     | 70.7     | 0.048    | 0.855    | 0.048                | 0.855                | 0.862                | 0     | U   | U  |
| DiBahP        | 62.2     | 62.2     | 0.027    | 0.999    | 0.027                | 0.999                | 0.999                | 0     | U   | U  |
| <b>OCPs</b>   |          |          |          |          |                      |                      |                      |       |     |    |
| OCP-SS        | 77.0     | 68.7     | 0.049    | 0.105    | 0.049                | 0.105                | 0.156                | 0     | U   | U  |
| $\alpha$ -HCH | 93.5     | 101.3    | 0.034    | 0.340    | 0.034                | 0.340                | 0.392                | 0     | U   | U  |
| HCB           | 89.3     | 96.1     | 0.163    | 0.094    | 0.163                | 0.094                | 0.156                | U     | U   | U  |
| $\beta$ -HCH  | 87.3     | 91.2     | 0.183    | 0.195    | 0.183                | 0.195                | 0.224                | U     | U   | U  |
| $\gamma$ -HCH | 92.9     | 99.8     | 0.132    | 0.124    | 0.132                | 0.124                | 0.186                | U     | U   | U  |
| $\delta$ -HCH | 87.5     | 96.1     | 0.222    | 0.043    | 0.222                | 0.043                | 0.078                | S     | S   | CC |
| HC            | 85.8     | 95.7     | 0.093    | 0.049    | 0.093                | 0.049                | 0.098                | S     | S   | CC |

|              |       |       |       |       |       |       |       |   |   |    |
|--------------|-------|-------|-------|-------|-------|-------|-------|---|---|----|
| Ald          | 86.5  | 97.5  | 0.202 | 0.028 | 0.202 | 0.028 | 0.052 | S | S | CC |
| ID           | 88.4  | 97.8  | 0.367 | 0.008 | 0.367 | 0.008 | 0.015 | S | S | CC |
| cHCP         | 89.7  | 87.9  | 0.042 | 0.720 | 0.042 | 0.720 | 0.734 | 0 | U | U  |
| oCd          | 91.1  | 94.8  | 0.234 | 0.167 | 0.234 | 0.167 | 0.186 | U | U | U  |
| tHCP         | 85.4  | 95.6  | 0.188 | 0.097 | 0.188 | 0.097 | 0.138 | U | U | U  |
| tCd          | 87.5  | 98.3  | 0.231 | 0.023 | 0.231 | 0.023 | 0.049 | S | S | CC |
| o,p'-DDE     | 93.2  | 102.8 | 0.122 | 0.123 | 0.122 | 0.123 | 0.186 | U | U | U  |
| ES I         | 116.8 | 99.5  | 0.537 | 0.004 | 0.537 | 0.004 | 0.007 | S | S | CC |
| cCd          | 83.3  | 95.1  | 0.298 | 0.017 | 0.298 | 0.017 | 0.036 | S | S | CC |
| Dld          | 104.6 | 101.4 | 0.174 | 0.297 | 0.174 | 0.297 | 0.322 | U | U | U  |
| p,p'-DDE     | 81.8  | 94.3  | 0.250 | 0.053 | 0.250 | 0.053 | 0.088 | U | U | U  |
| o,p'-DDD     | 84.6  | 98.9  | 0.266 | 0.041 | 0.266 | 0.041 | 0.069 | S | S | CC |
| Ed           | 92.2  | 95.8  | 0.705 | 0.203 | 0.705 | 0.203 | 0.212 | U | U | U  |
| ES II        | 85.2  | 94.9  | 0.870 | 0.039 | 0.870 | 0.039 | 0.041 | S | S | CC |
| p,p'-DDD     | 84.3  | 97.7  | 0.278 | 0.216 | 0.278 | 0.216 | 0.250 | U | U | U  |
| o,p'-DDT     | 84.4  | 94.9  | 0.228 | 0.180 | 0.228 | 0.180 | 0.226 | U | U | U  |
| p,p'-DDT     | 108.1 | 98.6  | 0.078 | 0.866 | 0.078 | 0.866 | 0.873 | U | U | U  |
| MOC          | 51.3  | 95.6  | 0.594 | 0.001 | 0.594 | 0.001 | 0.002 | S | S | CC |
| Mirex        | 66.1  | 98.6  | 0.555 | 0.019 | 0.555 | 0.019 | 0.022 | S | S | CC |
| <b>PBDEs</b> |       |       |       |       |       |       |       |   |   |    |
| PBDE 17      | 96.3  | 98.3  | 0.050 | 0.453 | 0.050 | 0.453 | 0.493 | U | U | U  |
| PBDE 28      | 97.0  | 96.5  | 0.840 | 0.900 | 0.840 | 0.900 | 0.900 | U | U | U  |
| PBDE-SS      | 93.3  | 96.3  | 0.052 | 0.020 | 0.052 | 0.020 | 0.051 | S | S | CC |
| PBDE 71      | 95.3  | 93.4  | 0.905 | 0.296 | 0.905 | 0.296 | 0.296 | U | U | U  |
| PBDE 47      | 96.7  | 90.0  | 0.093 | 0.173 | 0.093 | 0.173 | 0.218 | U | U | U  |
| PBDE 66      | 99.4  | 89.4  | 0.146 | 0.005 | 0.146 | 0.005 | 0.012 | S | S | SC |
| PBDE 100     | 97.9  | 95.0  | 0.661 | 0.165 | 0.661 | 0.165 | 0.174 | U | U | U  |
| PBDE 99      | 100.3 | 87.9  | 0.087 | 0.008 | 0.087 | 0.008 | 0.025 | S | S | SC |
| PBDE 85      | 106.0 | 84.0  | 0.350 | 0.009 | 0.350 | 0.009 | 0.019 | S | S | SC |
| PBDE 154     | 101.7 | 88.0  | 0.397 | 0.004 | 0.397 | 0.004 | 0.011 | S | S | SC |
| PBDE 153     | 105.9 | 79.2  | 0.261 | 0.002 | 0.261 | 0.002 | 0.012 | S | S | SC |
| PBDE 138     | 105.2 | 74.7  | 0.066 | 0.002 | 0.066 | 0.002 | 0.010 | S | S | SC |
| PBDE 183     | 103.0 | 75.5  | 0.324 | 0.002 | 0.324 | 0.002 | 0.010 | S | S | SC |
| PBDE 190     | 106.9 | 63.4  | 0.151 | 0.001 | 0.151 | 0.001 | 0.008 | S | S | SC |
| PBDE 209     | 149.8 | 48.1  | 0.312 | 0.001 | 0.312 | 0.001 | 0.003 | S | S | SC |
| <b>PCBs</b>  |       |       |       |       |       |       |       |   |   |    |
| PCB 18       | 74.1  | 100.3 | 0.282 | 0.006 | 0.282 | 0.006 | 0.019 | S | S | CC |
| PCB 44       | 71.8  | 101.1 | 0.149 | 0.004 | 0.149 | 0.004 | 0.011 | S | S | CC |
| PCB 49       | 70.1  | 106.2 | 0.121 | 0.002 | 0.121 | 0.002 | 0.011 | S | S | CC |
| PCB 52       | 83.2  | 105.5 | 0.238 | 0.028 | 0.238 | 0.028 | 0.041 | S | S | CC |
| PCB 37       | 86.0  | 81.3  | 0.135 | 0.791 | 0.135 | 0.791 | 0.803 | U | U | U  |
| PCB 70       | 86.6  | 99.2  | 0.063 | 0.059 | 0.063 | 0.059 | 0.099 | U | U | U  |
| PCB 74       | 82.4  | 97.6  | 0.119 | 0.109 | 0.119 | 0.109 | 0.151 | U | U | U  |
| PCB 87       | 83.1  | 107.2 | 0.461 | 0.012 | 0.461 | 0.012 | 0.016 | S | S | CC |
| PCB 99       | 80.7  | 101.1 | 0.348 | 0.005 | 0.348 | 0.005 | 0.008 | S | S | CC |
| PCB 114      | 82.2  | 103.5 | 0.323 | 0.014 | 0.323 | 0.014 | 0.021 | S | S | CC |

|             |       |       |       |       |       |       |       |   |   |    |
|-------------|-------|-------|-------|-------|-------|-------|-------|---|---|----|
| PCB 101     | 85.7  | 104.0 | 0.052 | 0.125 | 0.052 | 0.125 | 0.190 | U | U | U  |
| PCB 81      | 89.4  | 37.5  | 0.436 | 0.004 | 0.436 | 0.004 | 0.010 | S | S | SC |
| PCB 77      | 84.9  | 72.2  | 0.155 | 0.422 | 0.155 | 0.422 | 0.453 | U | U | U  |
| PCB 151     | 85.6  | 100.5 | 0.194 | 0.003 | 0.194 | 0.003 | 0.011 | S | S | CC |
| PCB 119     | 79.7  | 89.6  | 0.256 | 0.068 | 0.256 | 0.068 | 0.083 | U | U | U  |
| PCB 105     | 81.6  | 82.0  | 0.752 | 0.898 | 0.752 | 0.898 | 0.898 | U | U | U  |
| PCB 123     | 84.7  | 87.5  | 0.174 | 0.723 | 0.174 | 0.723 | 0.729 | U | U | U  |
| PCB 153/157 | 85.7  | 90.5  | 0.064 | 0.570 | 0.064 | 0.570 | 0.592 | U | U | U  |
| PCB 118     | 88.4  | 79.5  | 0.062 | 0.400 | 0.062 | 0.400 | 0.432 | U | U | U  |
| PCB-SS      | 97.4  | 85.5  | 0.124 | 0.120 | 0.124 | 0.120 | 0.186 | U | U | U  |
| PCB 128/158 | 93.8  | 92.1  | 0.668 | 0.631 | 0.668 | 0.631 | 0.632 | U | U | U  |
| PCB 126     | 80.0  | 75.1  | 0.353 | 0.304 | 0.353 | 0.304 | 0.313 | U | U | U  |
| PCB 180     | 88.9  | 86.0  | 0.140 | 0.794 | 0.140 | 0.794 | 0.806 | U | U | U  |
| PCB 177     | 84.8  | 90.2  | 0.121 | 0.026 | 0.121 | 0.026 | 0.046 | S | S | CC |
| PCB 138     | 88.5  | 92.9  | 0.124 | 0.516 | 0.124 | 0.516 | 0.532 | U | U | U  |
| PCB 167     | 84.1  | 80.2  | 0.542 | 0.473 | 0.542 | 0.473 | 0.482 | U | U | U  |
| PCB 187     | 89.2  | 92.0  | 0.112 | 0.598 | 0.112 | 0.598 | 0.620 | U | U | U  |
| PCB 156     | 83.1  | 77.1  | 0.213 | 0.402 | 0.213 | 0.402 | 0.417 | U | U | U  |
| PCB 168     | 85.5  | 88.3  | 0.202 | 0.756 | 0.202 | 0.756 | 0.768 | U | U | U  |
| PCB 183     | 94.0  | 90.6  | 0.176 | 0.592 | 0.176 | 0.592 | 0.610 | U | U | U  |
| PCB 169     | 114.7 | 101.0 | 0.042 | 0.366 | 0.042 | 0.366 | 0.412 | 0 | U | U  |
| PCB 170     | 120.7 | 91.6  | 0.134 | 0.052 | 0.134 | 0.052 | 0.109 | U | U | U  |
| PCB 199     | 103.2 | 102.9 | 0.115 | 0.969 | 0.115 | 0.969 | 0.970 | U | U | U  |
| PCB 189     | 100.4 | 88.0  | 0.322 | 0.023 | 0.322 | 0.023 | 0.033 | S | S | SC |
| PCB 194     | 96.4  | 109.4 | 0.201 | 0.327 | 0.201 | 0.327 | 0.368 | U | U | U  |

Note: U – no significance, S – significance, 0 – unsuitable for ANOVA or IST, QJ – quality

judgment

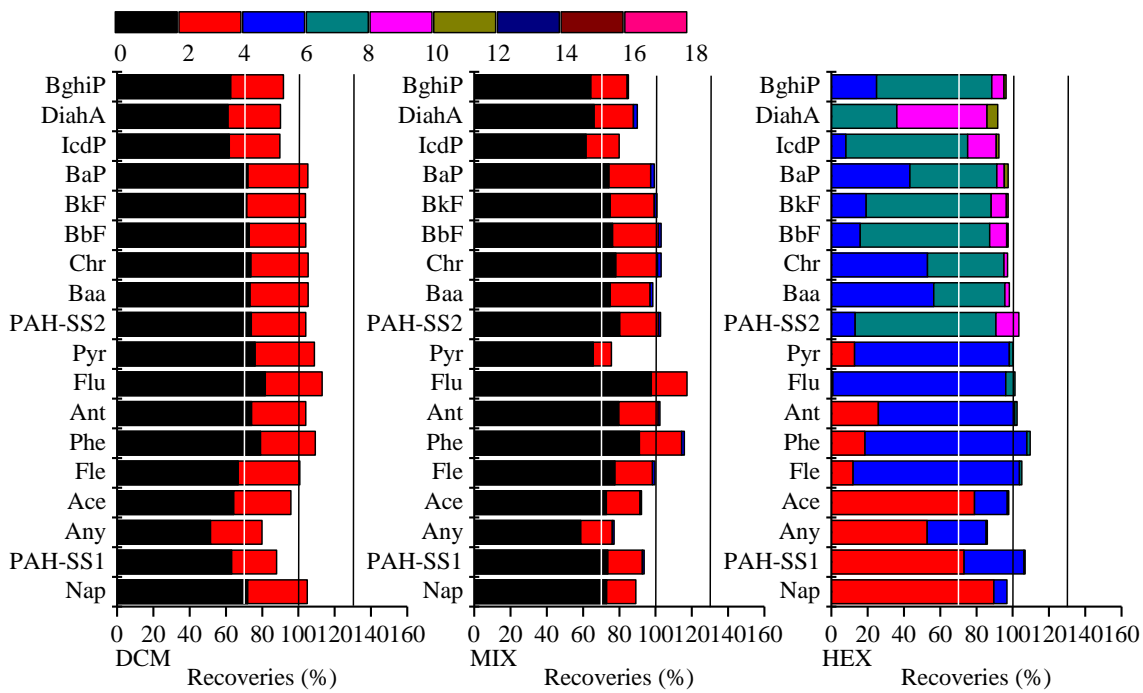

Fig. S1 Recoveries of PAHs at each SPE eluate (MIX – DCM/HEX (1:1, v/v))

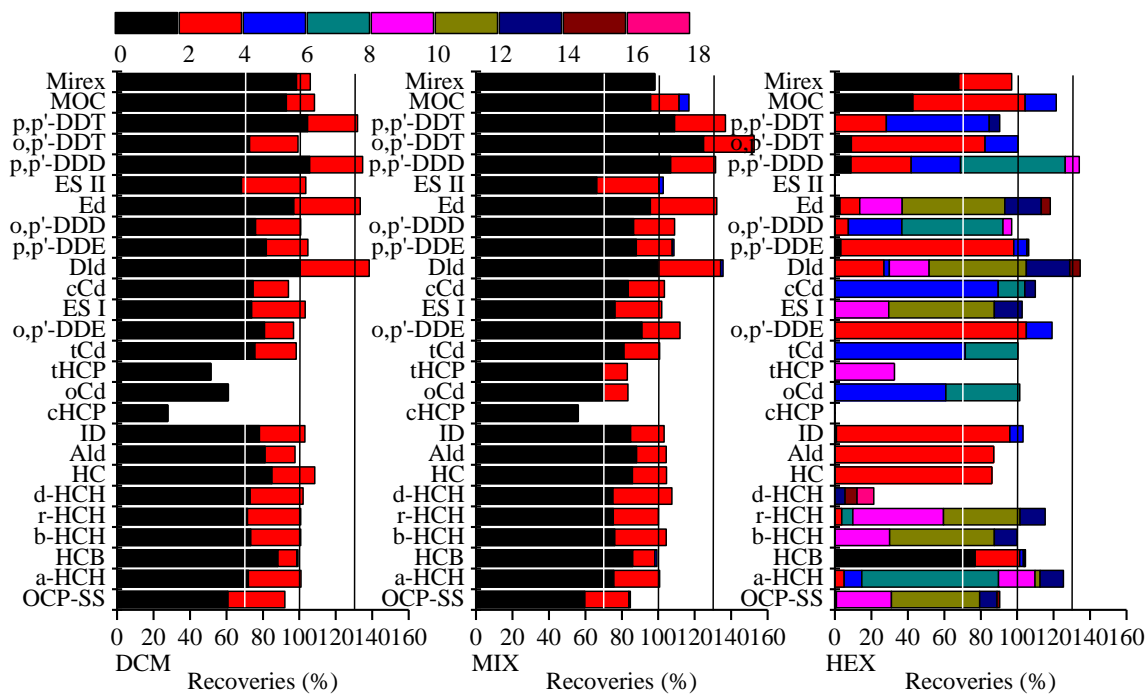

Fig. S2 Recoveries of OCPs at each SPE eluate (MIX – DCM/HEX (1:1, v/v))

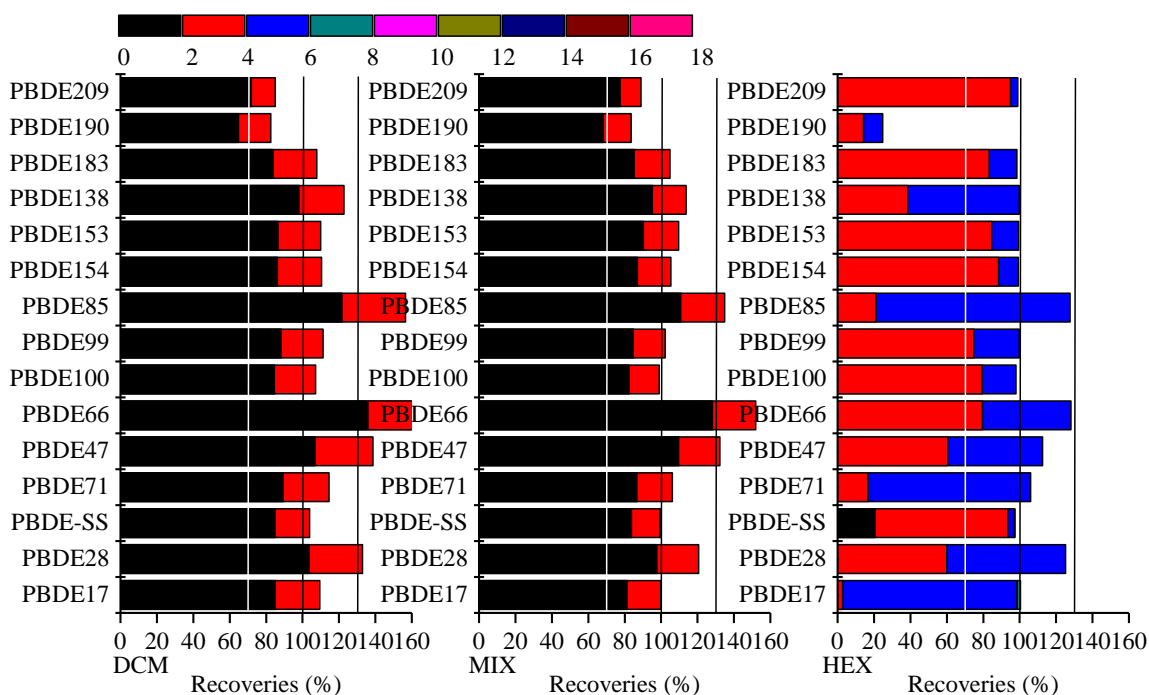

Fig. S3 Recoveries of PBDEs at each SPE eluate (MIX – DCM/HEX (1:1, v/v))

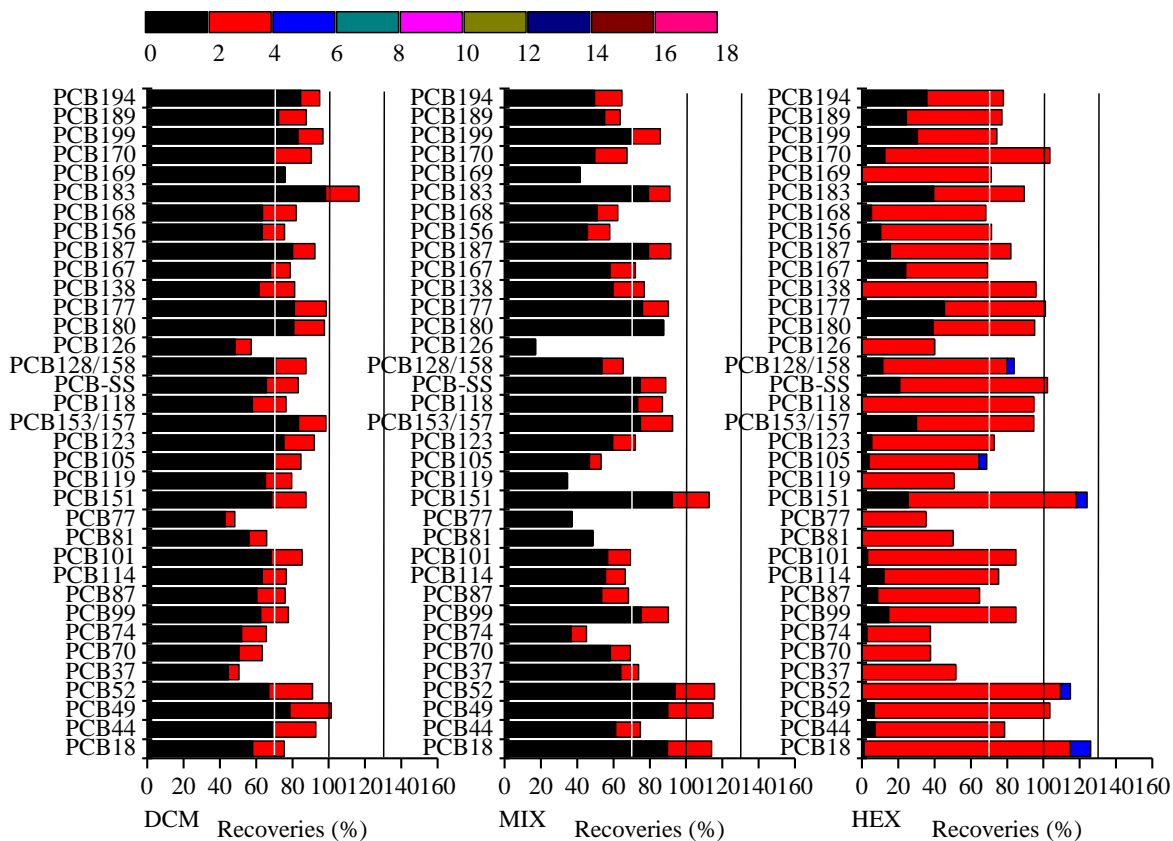

Fig. S4 Recoveries of PCBs at each SPE eluate (MIX – DCM/HEX (1:1, v/v))
